# Supplementary material
Source: ML conference proceedings conference paper supplement (https://openreview.net/forum?id=gX42SSbjcC)
Supplement: supplementary_material [file FutureMind- Equipping Small Language Models with Strategic Thinking-Pattern Priors via Adaptive Knowledge Distillation.pdf › ICLR_2142/paper/FutureMind- Equipping Small Language Models with Strategic Thinking-Pattern Priors via Adaptive Knowledge Distillation.pdf]

# FUTUREMIND: EQUIPPING SMALL LANGUAGE MODELS WITH STRATEGIC THINKING-PATTERN PRIORS VIA ADAPTIVE KNOWLEDGE DISTILLATION

**Anonymous authors**

Paper under double-blind review

## ABSTRACT

Small Language Models (SLMs) are attractive for cost-sensitive and resource-limited settings due to their efficient, low-latency inference. However, they often struggle with complex, knowledge-intensive tasks that require structured reasoning and effective retrieval. To address these limitations, we propose FutureMind, a modular reasoning framework that equips SLMs with strategic thinking-pattern priors via adaptive knowledge distillation from large language models (LLMs). FutureMind introduces a dynamic reasoning pipeline composed of four key modules: Problem Analysis, Logical Reasoning, Strategy Planning, and Retrieval Guidance. This pipeline is augmented by three distinct retrieval paradigms that decompose complex queries into tractable subproblems, ensuring efficient and accurate retrieval execution. Extensive experiments on multi-hop QA benchmarks, including 2WikiMultihopQA, MuSiQue, Bamboogle, and Frames, demonstrate the superiority of FutureMind. It consistently outperforms strong baselines such as Search-o1, achieving state-of-the-art results under zero-training conditions across diverse SLM architectures and scales. Beyond empirical gains, our analysis reveals that the process of thinking-pattern distillation is restricted by the cognitive bias bottleneck between the teacher (LLMs) and student (SLMs) models. This provides new perspectives on the transferability of reasoning skills, paving the way for the development of SLMs that combine efficiency with genuine cognitive capability.

## 1 INTRODUCTION

In recent years, driven by massive datasets and scalable computing, Large Language Models (LLMs) have achieved outstanding problem-understanding and problem-solving performance on a wide range of general tasks such as commonsense inference (Yang et al., 2025), code generation (Guo et al., 2024), and mathematical reasoning (Shao et al., 2024) through pre-training (Raffel et al., 2020), instruction tuning (Wei et al., 2022a), reinforcement learning from human feedback (RLHF) (Touvron et al., 2023; OpenAI, 2023). However, once problems become time-sensitive or require domain-specific knowledge (Peng et al., 2023; Li et al., 2023b), model performance is constrained by their inherent, static parameters, exposing shortcomings like stale knowledge and insufficient domain coverage. This limitation highlights the necessity of introducing external knowledge sources during reasoning. Against this backdrop, Retrieval-Augmented Generation (RAG) (Gao et al., 2023; Xiong et al., 2025) has emerged: by supplying the model with retrieved documents before inference, it effectively enhances both the accuracy and domain adaptability of language models. Yet, single-step retrieval often struggles with knowledge-intensive, multi-hop reasoning tasks (Yang et al., 2018; Ho et al., 2020b). In response, recent studies have proposed "deep search" paradigms (Li et al., 2025c; Alzubi et al., 2025) that emphasize dynamic interaction between reasoning and retrieval: during problem solving, the model continuously decomposes the question, iteratively retrieves information, and aggregates evidence until the answer converges.

As problem complexity grows, increasing model size or memory alone is insufficient; effective reasoning also requires explicit "retrieval logic" to determine when, what, and how to retrieve relevant evidence (Schick et al., 2023; Zhang et al., 2024). Search-o1 (Li et al., 2025a) integrates retrieval into the chain-of-thought, while ReAct (Yao et al., 2023) formalizes a "reasoning-acting-observing-reasoning" paradigm for targeted external information (Li et al., 2025b). These

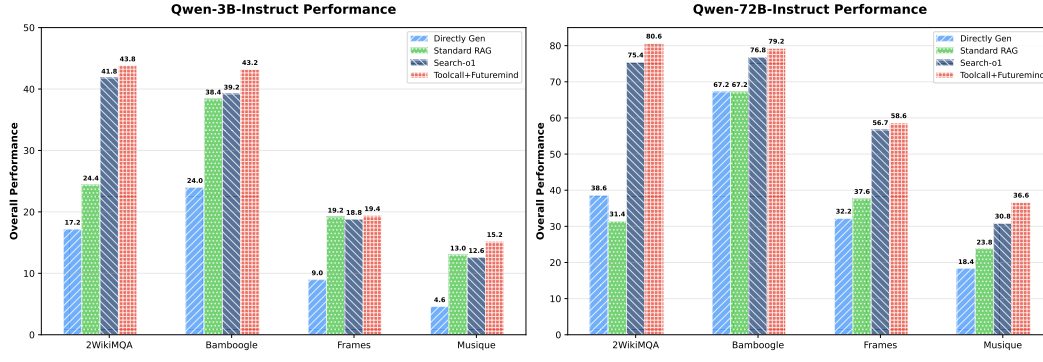

Figure 1: Overall performance comparison of FutureMind with other methods across four multi-hop QA benchmarks. The left panel depicts the performance on a 3B small language model (SLM), while the right panel illustrates the performance on a 72B large language model (LLM).

approaches illustrate a long-standing consensus: LLM capabilities should be activated dynamically and on demand during inference (Wang et al., 2024b; Jin et al., 2024b). For autonomous agents, this shifts the objective from answering directly to reasoning systematically—analyzing, decomposing, and integrating evidence for deeper insight and more robust strategies.

However, implementing explicit retrieval logic places substantial demands on model capabilities. LLMs are proficient in multi-turn reasoning and retrieval but incur prohibitive latency and computational costs (Wan et al., 2023; Wang, 2024). In contrast, SLMs offer notable advantages in efficiency, cost, and privacy, but their limited memory, weak context retention, and restricted structured reasoning hinder effective problem decomposition, iterative evidence retrieval, and multi-hop aggregation (Wang et al., 2024a; Xu et al., 2025). Consequently, achieving an optimal balance between reasoning effectiveness and computational efficiency remains a critical and unresolved challenge (Bai et al., 2024), particularly for resource-constrained models deployed in real-time or privacy-sensitive scenarios.

To this end, we propose **FutureMind**, a zero-training-cost modular reasoning framework that enables low-latency and high-accuracy complex reasoning without gradient updates, leveraging an adaptive thinking-pattern distillation strategy. FutureMind decomposes reasoning into a four-stage pipeline—**Problem Analysis**, **Logical Reasoning**, **Strategy Planning**, and **Retrieval Guidance**—which sequentially address whether to retrieve, what to retrieve, how to integrate retrieved evidence, and how to generate a coherent answer. To further reduce retrieval overhead, we design three retrieval paradigms based on the decomposition of complex-question retrieval logic: (1) **Forward Stepwise Reasoning** — progressive expansion of sub-queries; (2) **Backward Constraint Focusing** — start from answer constraints and narrow search; (3) **Parallel Intersection Reasoning** — run parallel sub-searches and intersect evidence. By completing the reasoning strategy within a single turn, the framework endows models with clear planning, retrieval, and knowledge-synthesis capabilities, bridging the gap between reasoning depth and efficiency. The contributions of this paper are summarised as follows:

1. **A zero-training-cost modular reasoning framework:** We propose FutureMind, a four-stage pipeline (Problem Analysis, Logic Reasoning, Strategy Planning, Retrieval Guidance) supplemented by a dynamic thinking module that provides explicit knowledge support for structured reasoning. The framework is applicable to both LLMs and SLMs, balancing accuracy and efficiency, as shown in Figure 1.
2. **Composable retrieval strategies:** We design three adaptive retrieval paradigms (forward stepwise reasoning, backward constraint focusing, parallel intersection reasoning) that decompose complex multi-hop questions into manageable sub-queries and perform evidence integration efficiently.
3. **Systematic experiments and cognitive insights:** Experiments on four multi-hop QA benchmarks demonstrate that FutureMind consistently improves performance across models of various architectures and scales, with the largest gains on SLMs, establishing a new state

of the art among training-free methods. Moreover, we identify a "cognitive-bias bottleneck": once the teacher's plan surpasses the student's capacity, distillation becomes lossy, snapping reasoning chains and amplifying noise. This emphasizes the importance of teacher-student compatibility over raw model size, offering guidance for the design of lightweight yet scalable reasoning systems.

## 2 RELATED WORK

**Large Language Models and Retrieval.** LLMs (Achiam et al., 2023; Team, 2024) exhibit strong reasoning and code-generation abilities (Guo et al., 2025; 2024), but remain prone to hallucination due to their reliance on static parametric knowledge (Zhang et al., 2023). To mitigate this, external search is widely adopted via (i) retrieval-augmented generation (RAG) (Gao et al., 2023), which integrates retrieved evidence into the generation process, and (ii) search-as-a-tool (Schick et al., 2023), where LLMs explicitly interact with a search engine through prompting (Trivedi et al., 2022; Schick et al., 2023) or fine-tuning (Schick et al., 2023). However, RAG's static, single-stage retrieval—i.e., a non-adaptive, one-shot lookup that ignores query complexity and intermediate generation signals—can return irrelevant or weakly informative passages, impeding compositional and multi-hop reasoning (Jin et al., 2024a); tool-based approaches, though more interactive, still struggle to retrieve evidence that is sufficiently relevant and precise for complex, multi-step inference.

**Small Language Models and Cognitive Transfer.** SLMs are attractive for cost-sensitive, low-latency, and privacy-preserving applications, yet they exhibit pronounced deficiencies in memory, context propagation, and structured, multi-step reasoning (Fu et al., 2023; Hsieh et al., 2023). To close this gap, **Cognitive-Transfer techniques** attempt to migrate reasoning behaviors from larger models. **CoT Distillation** transfers step-by-step traces (Wei et al., 2022b; Wang et al., 2023; Fu et al., 2023) but provides limited adaptivity and can be brittle under distributional or stylistic shift. **Prompt Distillation** reduces stylistic mismatch by extracting compact prompts (Li et al., 2023a; Chen & Feng, 2023), yet typically encodes mostly static knowledge templates that do not support dynamic planning. Retrieval-augmented transfers such as **Meta-RAG** improve efficiency through external knowledge (Mombaerts et al., 2024), but commonly treat retrieval as a fixed, non-adaptive pipeline and thus fail to fully integrate retrieval with adaptive reasoning. Overall, these approaches only partially mitigate SLMs' reasoning deficits and lack the generalizability and dynamic adaptivity required for robust problem decomposition, iterative retrieval, and multi-hop aggregation—motivating methods that endow SLMs with lightweight, structured reasoning routines and strategic retrieval policies.

## 3 METHODOLOGY

### 3.1 OVERVIEW

FutureMind is a modular reasoning framework that employs **adaptive knowledge distillation** to transfer structured reasoning and retrieval strategies from teacher models to student models. Unlike conventional distillation methods, which primarily focus on compressing knowledge representations, FutureMind targets the distillation of **systematic thinking patterns**. Specifically, it captures the complete logical chain from problem definition to retrieval guidance, abstracting these patterns into lightweight, reusable strategic thinking-pattern priors. This design enables student models, particularly SLM, to perform adaptive reasoning and deep, structured retrieval planning, thereby achieving superior retrieval performance even in resource-constrained environments.

As depicted in Figure 2, FutureMind is coordinated by the **Thinking Module**, which dynamically generates the optimal retrieval strategies based on task characteristics, data availability, and efficiency constraints. It of four core modules: **Problem Analysis**, **Logical Reasoning**, **Strategy Planning**, and **Retrieval Guidance**, achieving modularity, interpretability, and end-to-end optimization.

Formally, FutureMind is a four-stage pipeline coordinated by the Thinking Module  $\mathcal{M}$ :

$$F = \mathcal{M}\langle \mathcal{P}, \mathcal{L}, \mathcal{S}, \mathcal{R} \rangle, \quad (1)$$

where  $\mathcal{P}$ ,  $\mathcal{L}$ ,  $\mathcal{S}$ , and  $\mathcal{R}$  represent Problem Analysis, Logical Reasoning, Strategy Planning, and Retrieval Guidance, respectively.

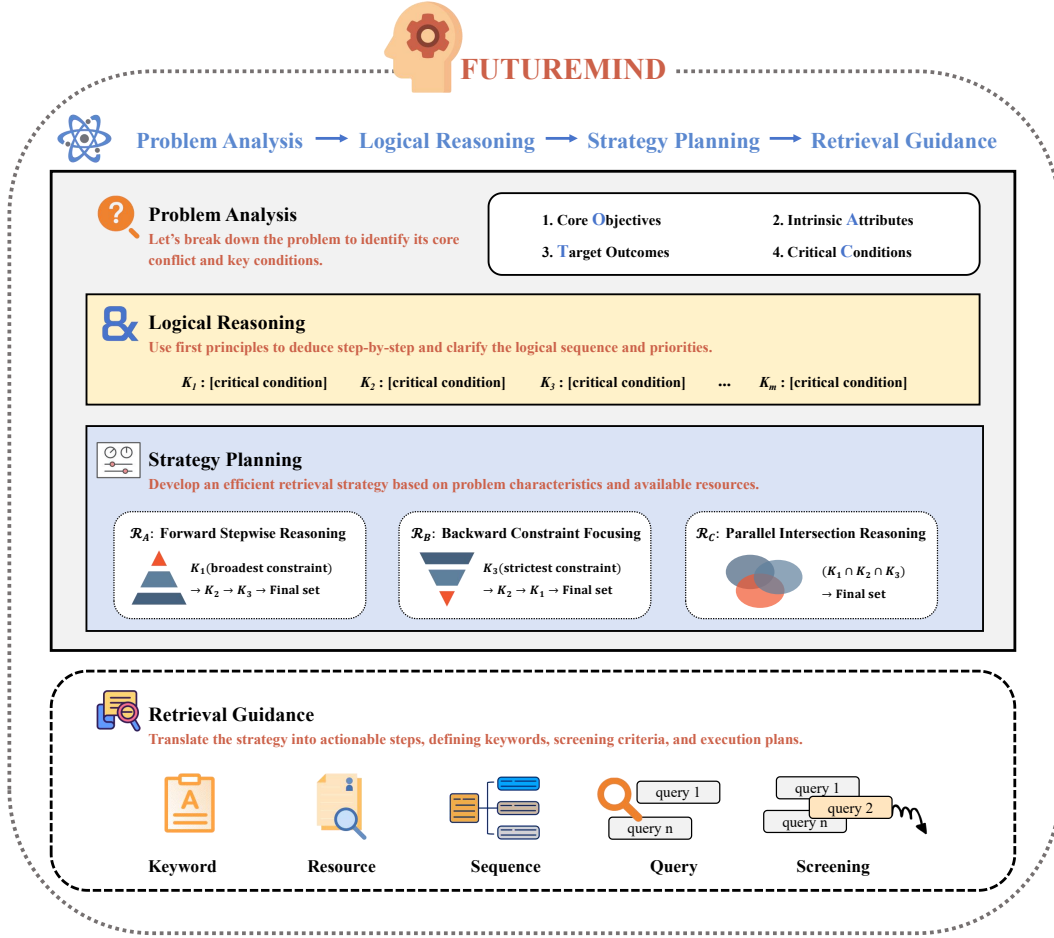

Figure 2: Overview of the FutureMind framework.

Subsequently, we provide a comprehensive overview of the four core modules of FutureMind.

### 3.2 MODULE DEFINITIONS

#### 3.2.1 PROBLEM ANALYSIS $\mathcal{P}$

The Problem Analysis module initiates the reasoning pipeline by decomposing the input query  $x$  into its fundamental components. This decomposition yields a structured representation that enables subsequent reasoning and decision-making processes. Specifically, this module identifies the following key elements:

$$\mathcal{P}(x) \rightarrow (\mathcal{O}, \mathcal{A}, \mathcal{T}, \mathcal{C}), \quad (2)$$

where:

- $\mathcal{O}$  represents the core objectives, which define the primary direction and desired outcomes of the problem-solving process.
- $\mathcal{A}$  denotes the intrinsic attributes, characterizing the inherent properties and conditions of the problem.
- $\mathcal{T}$  specifies the target outcomes, indicating the expected results or output types upon problem resolution.
- $\mathcal{C} = \{C_1, C_2, \dots, C_n\}$  captures the key dimensions, which are critical conditions or factors within the problem, each  $C_i$  representing a specific dimension.

By systematically decomposing the input query into these components, the Problem Analysis module establishes a clear, structured foundation for the subsequent reasoning stages.

### 3.2.2 LOGICAL REASONING $\mathcal{L}$

The Logical Reasoning module applies a *first-principles approach* to derive core problem mechanisms. It identifies the most fundamental principles and applies deductive reasoning to construct a coherent abstraction, grounding inference in causal structures and minimizing reliance on incomplete prior knowledge. Formally:

$$\mathcal{L}(\mathcal{O}, \mathcal{A}, \mathcal{T}, \mathcal{C}) \rightarrow (\mathcal{M}, \mathcal{K}), \quad (3)$$

where:

- $\mathcal{O}$ ,  $\mathcal{A}$ ,  $\mathcal{T}$ , and  $\mathcal{C}$  denote the core objectives, intrinsic attributes, target outcomes, and key dimensions extracted from Problem Analysis.
- $\mathcal{M}$  represents the mechanistic understanding, capturing causal relations and fundamental principles governing the system.
- $\mathcal{K} = \{K_1, K_2, \dots, K_m\}$  is an ordered set of critical conditions, prioritized by logical dependency and discriminative importance.

Grounding reasoning in first principles improves interpretability and adaptability, especially in complex or knowledge-intensive tasks where heuristics are insufficient. By decomposing the problem into basic components, identifying key conditions, and arranging them in order of logical priority, the module converts the structured input from Problem Analysis into a mechanistic abstraction  $(\mathcal{M}, \mathcal{K})$ . This abstraction serves as the foundation for Strategy Planning and Retrieval Guidance.

### 3.2.3 STRATEGY PLANNING $\mathcal{S}$

The Strategy Planning module bridges the mechanistic insights from Logical Reasoning and the normative layer of Retrieval Guidance. It dynamically determines the optimal retrieval strategy  $\mathcal{R}^*$  based on the mechanistic understanding  $\mathcal{M}$  and the prioritized condition sequence  $\mathcal{K} = \{K_1, K_2, \dots, K_m\}$ . Formally:

$$\mathcal{S}(\mathcal{M}, \mathcal{K}) \rightarrow \mathcal{R}^*, \quad \mathcal{R}^* = \arg \min_{\mathcal{R} \in \mathcal{P}_{\text{cand}}} \mathcal{F}(\mathcal{R}; \mathcal{M}, \mathcal{K}), \quad (4)$$

where:

- $\mathcal{M}$ : mechanistic understanding derived from logical reasoning.
- $\mathcal{K} = \{K_1, K_2, \dots, K_m\}$ : prioritized sequence of conditions.
- $\mathcal{P}_{\text{cand}} = \{\mathcal{R}_A, \mathcal{R}_B, \mathcal{R}_C\}$ : candidate pool of reasoning strategies.
- $\mathcal{F}(\cdot)$ : cost function evaluating efficiency, constraints, interdependencies and data availability.

Based on insights from knowledge-intensive tasks, we design three retrieval paradigms (Figure 3), dynamically selected based on the condition set topology  $\mathcal{K}$ .

Let  $\mathcal{U}$  denote the candidate space. For each condition  $K_i$ , we define an evaluation function  $\phi(K_i, x) \in \{0, 1\}$  that checks if candidate  $x \in \mathcal{U}$  satisfies  $K_i$ . Intermediate sets are defined as:

$$X_i = \{x \in \mathcal{U} \mid \phi(K_i, x) = 1\}, \quad X^* = \bigcap_{i=1}^m X_i. \quad (5)$$

**Strategy A: Forward Stepwise Reasoning ( $\mathcal{R}_A$ )** Used when early conditions are broad but effective in pruning. Constraints are applied sequentially from general to specific:

$$X_1 = \{x \in \mathcal{U} \mid \phi(K_1, x) = 1\}, \quad X_j = \{x \in X_{j-1} \mid \phi(K_j, x) = 1\}, \quad X^* = \bigcap_{i=1}^m X_i. \quad (6)$$

**Strategy B: Backward Constraint Focusing ( $\mathcal{R}_B$ )** Used when downstream conditions are highly selective. Reasoning starts with the tightest constraint and broadens progressively:

$$X_m = \{x \in \mathcal{U} \mid \phi(K_m, x) = 1\}, \quad X_j = \{x \in X_{j+1} \mid \phi(K_j, x) = 1\}, \quad X^* = \bigcap_{i=1}^m X_i. \quad (7)$$



**Strategy C: Parallel Intersection Reasoning ( $\mathcal{R}_C$ )** Best for independent or orthogonal conditions. All constraints are processed in parallel, then intersected:

$$X_i = \{x \in \mathcal{U} \mid \phi(K_i, x) = 1\}, \quad X^* = \bigcap_{i=1}^m X_i. \quad (8)$$

By deeply understanding knowledge-intensive problems, the module adaptively selects the optimal retrieval strategy to ensure efficient and precise retrieval execution.

### 3.2.4 RETRIEVAL GUIDANCE $\mathcal{R}$

The Retrieval Guidance module serves as a normative layer that transforms abstract reasoning and the selected retrieval strategy into structured instructions for execution. Unlike direct retrieval, this module generates prescriptive guidelines that specify how retrieval should be performed.

Given the mechanistic understanding  $\mathcal{M}$ , the prioritized conditions  $\mathcal{K}$ , and the chosen strategy  $\mathcal{R}^*$ , the module outputs a set of retrieval guidelines:

$$\mathcal{R}(\mathcal{M}, \mathcal{K}, \mathcal{R}^*) \rightarrow \Gamma, \quad (9)$$

where  $\Gamma = \{\gamma_1, \gamma_2, \dots, \gamma_q\}$  is a set of normative principles guiding the retrieval process (e.g., priority order, source preferences, evaluation criteria).

The guidance is structured into five key, complementary stages:

- **Keyword Guidance.** Identify core entities, attributes, and relations from  $\mathcal{K}$ , specifying lexical dimensions and semantic variants for adaptive retrieval across domains.
- **Resource Guidance.** Indicate source categories (e.g., academic databases, reports), ranked by relevance  $\mathcal{M}$  and credibility, guiding retrieval toward reliable knowledge domains.
- **Sequence Guidance.** Recommend the order of retrieval actions according to  $\mathcal{R}^*$ . For instance, a Forward Stepwise strategy suggests starting with broad repositories, while a Backward Constraint strategy prioritizes highly selective regulatory data.
- **Query Guidance.** Provide structural templates for query formulation (e.g., Boolean patterns), emphasizing inclusiveness in early searches and narrowing in later stages.
- **Screening Guidance.** Define the principles for evaluating retrieved results, including relevance to  $\mathcal{M}$ , credibility of sources, and methodological rigor. The module specifies evaluation criteria conceptually.

By structuring guidance around keywords, resources, sequencing, query formulation, and evaluation, the module bridges cognitive strategy with retrieval while maintaining executional independence.

## 4 EXPERIMENTS

### 4.1 EXPERIMENTAL SETUP

**Datasets.** We evaluate our approach on four widely-used multi-hop question answering (QA) benchmarks: **2WikiMultihopQA (2WikiMQA)** (Ho et al., 2020a), **Bamboogle** (Press et al., 2022), **MuSiQue** (Tang & Yang, 2024), and **FRAMES** (Krishna et al., 2024). Specifically, we randomly sample 500 instances from the validation sets of 2WikiMQA and MuSiQue, while evaluating on the full test sets of Bamboogle and FRAMES.

**Metrics.** For evaluation, following prior work (Sun et al., 2025), we adopt two complementary metrics: **Coverage-based Exact Match ( $\text{ACC}_E$ )** and **LLM-as-Judge ( $\text{ACC}_L$ )**.  $\text{ACC}_E$  checks whether the predicted answer fully covers the gold reference, allowing for paraphrastic variations. In contrast,  $\text{ACC}_L$  leverages GPT-4o-mini as an automatic evaluator to assess semantic correctness between predicted and gold answers. The full evaluation prompt for  $\text{ACC}_L$  is provided in Appendix F.1.

Table 1: Main results on four multi-hop QA benchmarks. **Bold** denotes the best performance and underline indicates the second best. Rows with blue background correspond to our methods TC+FM\*, where FM\* selects the best-performing FutureMind-enhanced variant for each base model.

| Model       | Method       | 2WikiMQA         |                  | Bamboogle        |                  | Frames           |                  | MuSiQue          |                  | AVG              |                  |
|-------------|--------------|------------------|------------------|------------------|------------------|------------------|------------------|------------------|------------------|------------------|------------------|
|             |              | ACC <sub>E</sub> | ACC <sub>L</sub> |
| Qwen-3B     | Naive Gen    | 16.80            | 17.20            | 20.80            | 24.00            | 5.94             | 8.98             | 3.60             | 4.60             | 11.79            | 13.70            |
|             | Standard RAG | 24.00            | 24.40            | 26.40            | 38.40            | <u>12.01</u>     | <u>19.17</u>     | 10.20            | <u>13.00</u>     | 18.15            | 23.74            |
|             | Search-o1    | 41.00            | 41.80            | 34.40            | 39.20            | 11.77            | 18.81            | <u>10.40</u>     | 12.60            | <u>24.39</u>     | 28.10            |
|             | TC+FM*       | <b>56.40</b>     | <b>43.80</b>     | <b>39.20</b>     | <b>43.20</b>     | <b>18.84</b>     | <b>19.42</b>     | <b>14.20</b>     | <b>15.20</b>     | <b>32.16</b>     | <b>30.41</b>     |
| Qwen-7B     | Naive Gen    | 29.40            | 25.20            | 34.40            | 37.60            | 11.29            | 16.87            | 7.60             | 10.80            | 20.67            | 22.62            |
|             | Standard RAG | 30.20            | 29.80            | 42.40            | <u>52.80</u>     | 15.78            | 24.76            | 13.20            | 16.80            | 25.39            | 31.04            |
|             | Search-o1    | <u>57.80</u>     | <u>59.80</u>     | 43.20            | 51.20            | <u>24.63</u>     | <b>38.34</b>     | <b>20.80</b>     | <b>23.80</b>     | <u>36.61</u>     | <u>43.29</u>     |
|             | TC+FM*       | <b>62.00</b>     | <b>64.00</b>     | <b>58.40</b>     | <b>64.80</b>     | <b>25.12</b>     | <u>34.71</u>     | <u>20.00</u>     | <u>23.80</u>     | <b>41.38</b>     | <b>46.83</b>     |
| Qwen-14B    | Naive Gen    | 30.40            | 30.80            | <u>48.80</u>     | 55.20            | 14.81            | 22.82            | 8.80             | 12.40            | 25.70            | 30.30            |
|             | Standard RAG | 27.40            | 28.40            | 44.80            | <u>56.00</u>     | 17.96            | 28.40            | 14.00            | 18.60            | 26.04            | 32.85            |
|             | Search-o1    | 66.80            | 68.40            | 43.20            | 55.20            | <u>30.46</u>     | 46.48            | <u>20.60</u>     | <u>25.60</u>     | 40.27            | 48.92            |
|             | TC+FM*       | <b>71.60</b>     | <b>75.20</b>     | <b>70.40</b>     | <b>72.80</b>     | <b>34.83</b>     | <b>49.51</b>     | <b>24.00</b>     | <b>28.20</b>     | <b>50.21</b>     | <b>56.43</b>     |
| Qwen-32B    | Naive Gen    | 30.80            | 31.30            | 54.40            | 60.80            | 15.66            | 24.51            | 10.80            | 15.20            | 27.91            | 32.95            |
|             | Standard RAG | 24.60            | 24.40            | 52.80            | 61.60            | 19.78            | 30.95            | 16.20            | 19.60            | 28.35            | 34.14            |
|             | Search-o1    | <u>68.60</u>     | <u>71.60</u>     | 60.80            | 67.20            | 34.34            | <b>54.12</b>     | <u>22.80</u>     | <u>27.80</u>     | <u>46.63</u>     | <u>55.18</u>     |
|             | TC+FM*       | <b>74.40</b>     | <b>77.80</b>     | <b>68.80</b>     | <b>72.80</b>     | <b>37.15</b>     | <u>53.86</u>     | <b>26.00</b>     | <b>30.40</b>     | <b>51.59</b>     | <b>58.71</b>     |
| Qwen-72B    | Naive Gen    | 38.20            | 38.60            | 60.00            | 67.20            | 21.12            | 32.16            | 12.80            | 18.40            | 33.03            | 39.09            |
|             | Standard RAG | 31.00            | 31.40            | 59.20            | 67.20            | 25.97            | 37.62            | 19.00            | 23.80            | 33.79            | 40.01            |
|             | Search-o1    | <u>72.60</u>     | <u>75.40</u>     | 67.20            | 72.80            | <u>37.37</u>     | <u>56.67</u>     | <u>24.60</u>     | <u>30.80</u>     | <u>50.44</u>     | <u>58.92</u>     |
|             | TC+FM*       | <b>74.20</b>     | <b>80.60</b>     | <b>75.20</b>     | <b>79.20</b>     | <b>41.38</b>     | <b>58.59</b>     | <b>28.40</b>     | <b>36.60</b>     | <b>54.80</b>     | <b>63.75</b>     |
| Llama3.1-8B | Naive Gen    | 38.20            | 38.60            | <b>60.00</b>     | <b>67.20</b>     | 21.12            | 32.16            | 12.80            | <u>18.40</u>     | 33.03            | 39.09            |
|             | Standard RAG | 29.20            | 30.40            | 39.20            | 47.20            | 15.05            | 22.82            | 12.20            | 15.20            | 23.91            | 28.90            |
|             | Search-o1    | <u>54.00</u>     | <u>56.00</u>     | 46.40            | 52.00            | <u>24.88</u>     | <u>37.62</u>     | <u>15.40</u>     | 18.20            | <u>35.17</u>     | 40.95            |
|             | TC+FM*       | <b>55.20</b>     | <u>56.80</u>     | <b>58.40</b>     | <u>64.00</u>     | <b>27.43</b>     | <b>39.92</b>     | <b>21.80</b>     | <b>25.20</b>     | <b>40.71</b>     | <b>46.48</b>     |

**Baselines.** We consider three categories of baselines: (1) **Naive Generation**: Generates answers without retrieval. (2) **Standard RAG** (Zhao et al., 2024): Retrieves documents using the original question as the query. (3) **Search-o1** (Li et al., 2025a): Performs self-initiated retrieval using prompts.

**Implementation Details.** We evaluate the effectiveness of the proposed **FutureMind** method using models at different architectures and scales (Qwen-2.5-3B/7B/14B/32B/72B-Instruct and Llama3.1-8B-Instruct). For generation, we set the maximum sequence length to 32768 tokens, with temperature = 0.0, top-p = 0.8, top-k = 20, and repetition penalty = 1.05 across all models. For retrieval, we employ the Google Web Search API, retrieving the top k = 10 results. In experiments, FutureMind leverages an enhanced version of **Toolcall** (TC), a ReAct-Style orchestration framework<sup>1</sup>. We modify the original TC framework by replacing its single search process with parallel search, enabling more efficient and robust aggregation of retrieved evidence. This configuration is referred to as **TC+FM**. Details of implementation are provided in Appendix E.

## 4.2 MAIN RESULTS

Table 1 compares the performance of different model architectures and scales across four multi-hop QA benchmarks, under four methods: naive generation, standard RAG, Search-o1, and ToolCall-driven FutureMind. Several key observations emerge from the results. Additional benchmark results are presented in Table 6 in Appendix B due to space limitations.

1. **Inherent Limitations of Baseline Methods.** Naive generation (internal knowledge only) yields the lowest accuracy, underscoring its inability to integrate external evidence. While standard RAG (retrieval-enabled) cannot reliably perform multi-step reasoning and may even underperform naive generation when reasoning integration fails. Search-o1 (reason-in-documents) enhances retrieval quality but remains limited: small models benefit minimally, and even larger models are constrained by these intrinsic summarization and integration capacity.

<sup>1</sup><https://github.com/QwenLM/Qwen-Agent/>

Table 2: Impact of Teacher Model Scale on Student Performance in multi-hop QA benchmarks. **Bold** denotes the best performance and underline indicates the second best. Rows with blue background correspond to the best teacher model scale for each student model.

| Model   | Method      | 2WikiMQA     |              | Bamboogle    |              | Frames       |              | MuSiQue      |              | Avg          |              |
|---------|-------------|--------------|--------------|--------------|--------------|--------------|--------------|--------------|--------------|--------------|--------------|
|         |             | $ACC_E$      | $ACC_L$      |
| Qwen-3B | TC          | 54.20        | 42.40        | 37.60        | 40.00        | 17.96        | <b>22.94</b> | 13.00        | 12.60        | 30.69        | 29.49        |
|         | TC+FM (3B)  | 42.00        | 30.80        | 28.00        | 30.40        | 11.53        | 10.32        | 7.40         | 8.60         | 22.23        | 20.03        |
|         | TC+FM (7B)  | 53.00        | 39.60        | 30.40        | 36.00        | 15.78        | 16.26        | 11.20        | 11.40        | 27.60        | 25.82        |
|         | TC+FM (14B) | <u>55.20</u> | <b>45.60</b> | <b>40.80</b> | 42.40        | <u>17.11</u> | <u>18.46</u> | <u>12.20</u> | <b>12.80</b> | <b>31.33</b> | <b>29.82</b> |
|         | TC+FM (32B) | 49.20        | 37.00        | 36.00        | 37.60        | 12.26        | 12.01        | 10.20        | 10.40        | 26.92        | 24.25        |
|         | TC+FM (72B) | <b>56.40</b> | 43.80        | <u>39.20</u> | <b>43.20</b> | <b>17.84</b> | 19.42        | <b>14.20</b> | 15.20        | 31.91        | 30.41        |
| Qwen-7B | TC          | 56.80        | 56.20        | 49.60        | 54.40        | 23.78        | 32.28        | 16.40        | 18.80        | 36.65        | 40.42        |
|         | TC+FM (3B)  | 60.20        | 60.00        | 49.60        | 50.40        | 23.09        | 30.83        | 17.00        | 19.60        | 37.97        | 40.21        |
|         | TC+FM (7B)  | 60.20        | 61.80        | 53.60        | 57.60        | 24.39        | 33.55        | 17.60        | 21.20        | 38.95        | 43.04        |
|         | TC+FM (14B) | <b>62.00</b> | <b>64.00</b> | <b>58.40</b> | <b>64.80</b> | <u>25.12</u> | <b>34.71</b> | <b>20.00</b> | <b>23.80</b> | <b>41.38</b> | <b>46.83</b> |
|         | TC+FM (32B) | 57.80        | 57.60        | 52.00        | 58.40        | 22.57        | 29.98        | 15.20        | 19.40        | 36.89        | 41.35        |
|         | TC+FM (72B) | <u>60.40</u> | 60.00        | <u>56.80</u> | 61.60        | <b>26.58</b> | <b>34.71</b> | <u>18.20</u> | <u>21.20</u> | 40.50        | 44.38        |

2. **Effectiveness of FutureMind with Adaptive Knowledge Distillation.** Unlike Search-o1’s fixed-prompt design, FutureMind employs adaptive knowledge, enabling a more flexible and effective problem-solving process that yields consistent performance gains. For instance, Qwen-3B improves on Frames ( $ACC_E$ : 11.77  $\rightarrow$  18.84), Llama3.1-8B on Bamboogle ( $ACC_L$ : 52.00  $\rightarrow$  64.00), and Qwen-72B on 2WikiMQA ( $ACC_L$ : 75.40  $\rightarrow$  80.60). By providing adaptive external strategy empowerment rather than depending solely on internal capability, FutureMind achieves stronger and more scalable reasoning, particularly under resource-constrained settings.

3. **Universal Applicability of FutureMind Across Model Architectures and Scales.** TC+FM\* achieves state-of-the-art results in nearly all settings, delivering scalable improvements across both model architectures and parameter scales. This demonstrates FutureMind’s broad effectiveness in enhancing multi-hop reasoning via external strategy transfer, alleviating capability bottlenecks in resource-limited models, while maintaining strong performance in larger models.

#### 4.3 IMPACT OF TEACHER MODEL DESIGN ON TEACHER-STUDENT COGNITIVE ALIGNMENT

We systematically analyze the impact of teacher model design on student performance in knowledge distillation (Table 2). Several consistent patterns emerge:

1. **Small-scale teachers models degrade student performance.** In TC+FM, using a 3B teacher for Qwen-3B reduces average performance ( $ACC_E$ : 30.69  $\rightarrow$  22.23,  $ACC_L$ : 29.49  $\rightarrow$  20.03), indicating that low-capacity teachers may generate noisy or misleading planning signals, hindering transfer effectiveness.
2. **Mid-scale teachers provide optimal alignment.** Both student models benefit most from the 14B teacher (Qwen-3B:  $ACC_E$ : 31.33,  $ACC_L$ : 29.82; Qwen-7B:  $ACC_E$ : 41.38,  $ACC_L$ : 46.83), outperforming the 32B variant and matching or exceeding the 72B model on average.
3. **Cognitive compatibility outweighs raw scale.** Although the 72B teacher excels in certain sub-tasks, it does not consistently surpass the 14B teacher on average (Qwen-7B student: 72B teacher  $ACC_E$ : 40.50,  $ACC_L$ : 44.38 < 14B teacher  $ACC_E$ : 41.38,  $ACC_L$ : 46.83), suggesting that cognitive alignment between teacher and student plays a more critical role in distillation effectiveness than raw scale.

The "cognitive bias bottleneck" further demonstrates that overly complex teacher plans may fail to transfer reasoning capabilities to smaller students, as lossy compression can disrupt critical reasoning chains or amplify noise. Therefore, in knowledge distillation, prioritizing teacher-student compatibility is more important than considering raw model size. Future work should systematically quantify planning quality and evaluate generalization across tasks and alignment strategies to ensure scalable reasoning in lightweight models.



Table 3: Ablation study of retrieval strategies on multi-hop QA benchmarks. **Bold** denotes the performance with all three retrieval strategies distilled from the Qwen-14B teacher.

| Model   | Method           | 2WikiMQA         |                  | Bamboogle        |                  | Frames           |                  | MuSiQue          |                  | Avg              |                  |
|---------|------------------|------------------|------------------|------------------|------------------|------------------|------------------|------------------|------------------|------------------|------------------|
|         |                  | ACC <sub>E</sub> | ACC <sub>L</sub> |
| Qwen-7B | All Strategies   | <b>62.00</b>     | <b>64.00</b>     | <b>58.40</b>     | <b>64.80</b>     | <b>25.12</b>     | <b>34.71</b>     | <b>20.00</b>     | <b>23.80</b>     | <b>41.38</b>     | <b>46.83</b>     |
|         | - w/o Strategy A | 57.40            | 57.80            | 54.20            | 60.00            | 24.64            | 32.16            | 16.60            | 21.20            | 38.21            | 42.79            |
|         | - w/o Strategy B | 58.80            | 58.00            | 57.60            | 61.60            | 25.09            | 34.47            | 18.40            | 22.60            | 39.97            | 44.67            |
|         | - w/o Strategy C | 60.40            | 59.00            | 54.40            | 60.80            | 24.72            | 33.37            | 17.40            | 21.40            | 39.23            | 43.64            |

Table 4: Ablation study of enhanced ToolCall across different models.

| Method   | Model       | 2WikiMQA         |                  | Bamboogle        |                  | Frames           |                  | MuSiQue          |                  | Avg              |                  |
|----------|-------------|------------------|------------------|------------------|------------------|------------------|------------------|------------------|------------------|------------------|------------------|
|          |             | ACC <sub>E</sub> | ACC <sub>L</sub> |
| ToolCall | Qwen-3B     | 54.20            | 42.40            | 37.60            | 40.00            | 17.96            | 22.94            | 13.00            | 12.60            | 30.69            | 29.49            |
|          | Qwen-7B     | 56.80            | 56.20            | 49.60            | 54.40            | 23.78            | 32.28            | 16.40            | 18.80            | 36.65            | 40.42            |
|          | Qwen-14B    | 64.40            | 64.60            | 64.00            | 68.00            | 34.22            | 44.66            | 20.40            | 23.20            | 45.76            | 50.11            |
|          | Qwen-32B    | 71.20            | 72.40            | 66.40            | 68.80            | 36.28            | 49.15            | 24.60            | 27.80            | 49.62            | 54.54            |
|          | Qwen-72B    | 71.60            | 74.20            | 68.80            | 76.80            | 40.04            | 56.67            | 27.40            | 35.00            | 51.96            | 60.67            |
|          | Llama3.1-8B | 51.20            | 51.40            | 55.20            | 57.60            | 24.51            | 37.38            | 17.40            | 20.80            | 37.08            | 41.80            |

Beyond scale, the teacher’s architecture, reasoning orientation, and instruction tuning must be compatible with the student. Experiments in Appendix B show that teachers with architectures well-aligned to the student consistently enable more effective thinking-pattern distillation, leading to improved multi-hop reasoning performance.

#### 4.4 ABLATION STUDIES

We perform ablations of individual retrieval strategies: Forward Stepwise Reasoning ( $\mathcal{R}_A$ ), Backward Constraint Focusing ( $\mathcal{R}_B$ ), and Parallel Intersection Reasoning ( $\mathcal{R}_C$ ). Removing any single strategy consistently degrades performance, confirming their complementary contributions, as shown in Table 3. These findings highlight the distinct roles of each retrieval strategy:  $\mathcal{R}_A$  is the most critical overall,  $\mathcal{R}_C$  has a stronger impact on datasets with independent conditions, and  $\mathcal{R}_B$  provides targeted improvements in constraint-focused scenarios.

We further conduct ablations to evaluate the impact of FutureMind by comparing the performance of enhanced ToolCall and ToolCall-driven FutureMind. As shown in Table 1 and Table 4, removing the FutureMind module consistently degrades performance, confirming its essential role in enhancing multi-hop reasoning.

## 5 CONCLUSION

We introduce **FutureMind**, a zero-training-cost modular reasoning framework that enables both large and small language models to perform efficient, accurate, and structured reasoning. By decomposing reasoning into **Problem Analysis**, **Logical Reasoning**, **Strategy Planning**, and **Retrieval Guidance**, and leveraging adaptive retrieval strategies, FutureMind provides clear guidance on when, what, and how to retrieve evidence, effectively balancing reasoning depth and efficiency.

Evaluations on four multi-hop QA benchmarks show consistent gains across model scales and architectures, with the largest improvements in SLMs. We further identify a *cognitive bias bottleneck* in teacher-student thinking-pattern distillation: overly complex teacher plans can overwhelm student capacity, causing lossy compression and degraded reasoning. Effective distillation requires both scale and architectural alignment, as structurally compatible teachers with aligned reasoning orientations enable more effective strategy transfer.

In summary, FutureMind shows that structured, adaptive reasoning is achievable even for SLMs, turning them into cognitively capable agents through strategic thinking-pattern priors.

## ETHICS STATEMENT

We strictly adhere to the ICLR Code of Ethics. This work only uses four publicly available multi-hop QA datasets and does not involve any personal or sensitive information, nor does it recruit human subjects. There are no conflicts of interest or foreseeable ethical risks associated with this study. Our research does not introduce ethical concerns beyond the scope of standard multi-hop question answering tasks.

## REPRODUCIBILITY STATEMENT

We will publicly release all experimental code and data processing scripts upon paper acceptance to ensure reproducibility. The four datasets used are publicly available (e.g., 2WikiMultihopQA, MuSiQue, Bamboogle, Frames), and the appendix details data preprocessing, retrieval configurations, and relevant hyperparameters. The main text provides sufficient descriptions of the model architecture, reasoning pipeline, and evaluation metrics to allow other researchers to replicate our results.

## REFERENCES

- Josh Achiam, Steven Adler, Sandhini Agarwal, Lama Ahmad, Ilge Akkaya, Florencia Leoni Aleman, Diogo Almeida, Janko Altschmidt, Sam Altman, Shyamal Anadkat, et al. Gpt-4 technical report. *arXiv preprint arXiv:2303.08774*, 2023.
- Salaheddin Alzubi, Creston Brooks, Purva Chiniya, Edoardo Contente, Chiara von Gerlach, Lucas Irwin, Yihan Jiang, Arda Kaz, Windsor Nguyen, Sewoong Oh, et al. Open deep search: Democratizing search with open-source reasoning agents. *arXiv preprint arXiv:2503.20201*, 2025.
- Guangji Bai, Zheng Chai, Chen Ling, Shiyu Wang, Jiaying Lu, Nan Zhang, Tingwei Shi, Ziyang Yu, Mengdan Zhu, Yifei Zhang, et al. Beyond efficiency: A systematic survey of resource-efficient large language models. *arXiv preprint arXiv:2401.00625*, 2024.
- Feng Chen and Yujian Feng. Chain-of-thought prompt distillation for multimodal named entity recognition and multimodal relation extraction. *arXiv preprint arXiv:2306.14122*, 2023.
- Yao Fu, Hao Peng, Litu Ou, Ashish Sabharwal, and Tushar Khot. Specializing smaller language models towards multi-step reasoning. In *International Conference on Machine Learning*, pp. 10421–10430. PMLR, 2023.
- Yunfan Gao, Yun Xiong, Xinyu Gao, Kangxiang Jia, Jinliu Pan, Yuxi Bi, Yi Dai, Jiawei Sun, Haofen Wang, and Haofen Wang. Retrieval-augmented generation for large language models: A survey. *arXiv preprint arXiv:2312.10997*, 2, 2023.
- Daya Guo, Qihao Zhu, Dejian Yang, Zhenda Xie, Kai Dong, Wentao Zhang, Guanting Chen, Xiao Bi, Yu Wu, YK Li, et al. Deepseek-coder: When the large language model meets programming—the rise of code intelligence. *arXiv preprint arXiv:2401.14196*, 2024.
- Daya Guo, Dejian Yang, Haowei Zhang, Junxiao Song, Ruoyu Zhang, Runxin Xu, Qihao Zhu, Shirong Ma, Peiyi Wang, Xiao Bi, et al. Deepseek-r1: Incentivizing reasoning capability in llms via reinforcement learning. *arXiv preprint arXiv:2501.12948*, 2025.
- Xanh Ho, Anh-Khoa Duong Nguyen, Saku Sugawara, and Akiko Aizawa. Constructing a multi-hop qa dataset for comprehensive evaluation of reasoning steps. *arXiv preprint arXiv:2011.01060*, 2020a.
- Xanh Ho, Anh-Khoa Duong Nguyen, Saku Sugawara, and Akiko Aizawa. Constructing a multi-hop qa dataset for comprehensive evaluation of reasoning steps. In *Proceedings of the 28th International Conference on Computational Linguistics*, pp. 6609–6625, 2020b.
- Cheng-Yu Hsieh, Chun-Liang Li, Chih-Kuan Yeh, Hootan Nakhost, Yasuhisa Fujii, Alexander Ratner, Ranjay Krishna, Chen-Yu Lee, and Tomas Pfister. Distilling step-by-step! outperforming larger language models with less training data and smaller model sizes. *arXiv preprint arXiv:2305.02301*, 2023.

- Bowen Jin, Jinsung Yoon, Jiawei Han, and Sercan O Arik. Long-context llms meet rag: Overcoming challenges for long inputs in rag. In *The Thirteenth International Conference on Learning Representations*, 2024a.
- Haolin Jin, Linghan Huang, Haipeng Cai, Jun Yan, Bo Li, and Huaming Chen. From llms to llm-based agents for software engineering: A survey of current, challenges and future. *arXiv preprint arXiv:2408.02479*, 2024b.
- Satyapriya Krishna, Kalpesh Krishna, Anhad Mohananey, Steven Schwarcz, Adam Stambler, Shyam Upadhyay, and Manaal Faruqui. Fact, fetch, and reason: A unified evaluation of retrieval-augmented generation. *arXiv preprint arXiv:2409.12941*, 2024.
- Lei Li, Yongfeng Zhang, and Li Chen. Prompt distillation for efficient llm-based recommendation. In *Proceedings of the 32nd ACM international conference on information and knowledge management*, pp. 1348–1357, 2023a.
- Xiaoxi Li, Guanting Dong, Jiajie Jin, Yuyao Zhang, Yujia Zhou, Yutao Zhu, Peitian Zhang, and Zhicheng Dou. Search-o1: Agentic search-enhanced large reasoning models. *CoRR*, abs/2501.05366, 2025a. doi: 10.48550/ARXIV.2501.05366. URL <https://doi.org/10.48550/arXiv.2501.05366>.
- Xiaoxi Li, Guanting Dong, Jiajie Jin, Yuyao Zhang, Yujia Zhou, Yutao Zhu, Peitian Zhang, and Zhicheng Dou. Search-o1: Agentic search-enhanced large reasoning models. *arXiv preprint arXiv:2501.05366*, 2025b.
- Xiaoxi Li, Jiajie Jin, Guanting Dong, Hongjin Qian, Yutao Zhu, Yongkang Wu, Ji-Rong Wen, and Zhicheng Dou. Webthinker: Empowering large reasoning models with deep research capability. *CoRR*, abs/2504.21776, 2025c. doi: 10.48550/ARXIV.2504.21776. URL <https://arxiv.org/abs/2504.21776>.
- Yinheng Li, Shaofei Wang, Han Ding, and Hang Chen. Large language models in finance: A survey. In *Proceedings of the fourth ACM international conference on AI in finance*, pp. 374–382, 2023b.
- Laurent Mombaerts, Terry Ding, Adi Banerjee, Florian Felice, Jonathan Taws, and Tarik Borogovac. Meta knowledge for retrieval augmented large language models. *arXiv preprint arXiv:2408.09017*, 2024.
- OpenAI. GPT-4 technical report. *CoRR*, abs/2303.08774, 2023. doi: 10.48550/ARXIV.2303.08774. URL <https://doi.org/10.48550/arXiv.2303.08774>.
- Cheng Peng, Xi Yang, Aokun Chen, Kaleb E Smith, Nima PourNejatian, Anthony B Costa, Cheryl Martin, Mona G Flores, Ying Zhang, Tanja Magoc, et al. A study of generative large language model for medical research and healthcare. *NPJ digital medicine*, 6(1):210, 2023.
- Ofir Press, Muru Zhang, Sewon Min, Ludwig Schmidt, Noah A Smith, and Mike Lewis. Measuring and narrowing the compositionality gap in language models. *arXiv preprint arXiv:2210.03350*, 2022.
- Colin Raffel, Noam Shazeer, Adam Roberts, Katherine Lee, Sharan Narang, Michael Matena, Yanqi Zhou, Wei Li, and Peter J. Liu. Exploring the limits of transfer learning with a unified text-to-text transformer. *J. Mach. Learn. Res.*, 21:140:1–140:67, 2020. URL <https://jmlr.org/papers/v21/20-074.html>.
- Timo Schick, Jane Dwivedi-Yu, Roberto Dessì, Roberta Raileanu, Maria Lomeli, Eric Hambro, Luke Zettlemoyer, Nicola Cancedda, and Thomas Scialom. Toolformer: Language models can teach themselves to use tools. *Advances in Neural Information Processing Systems*, 36:68539–68551, 2023.
- Zhihong Shao, Peiyi Wang, Qihao Zhu, Runxin Xu, Junxiao Song, Xiao Bi, Haowei Zhang, Mingchuan Zhang, YK Li, Y Wu, et al. Deepseekmath: Pushing the limits of mathematical reasoning in open language models. *arXiv preprint arXiv:2402.03300*, 2024.

- Zhongxiang Sun, Qipeng Wang, Weijie Yu, Xiaoxue Zang, Kai Zheng, Jun Xu, Xiao Zhang, Yang Song, and Han Li. Rearter: Retrieval-augmented reasoning with trustworthy process rewarding. In *Proceedings of the 48th International ACM SIGIR Conference on Research and Development in Information Retrieval*, pp. 1251–1261, 2025.
- Yixuan Tang and Yi Yang. Multihop-rag: Benchmarking retrieval-augmented generation for multi-hop queries. *arXiv preprint arXiv:2401.15391*, 2024.
- Gemini Team. Gemini 1.5: Unlocking multimodal understanding across millions of tokens of context. *arXiv preprint arXiv:2403.05530*, 2024.
- Hugo Touvron, Thibaut Lavril, Gautier Izacard, Xavier Martinet, Marie-Anne Lachaux, Timothée Lacroix, Baptiste Rozière, Naman Goyal, Eric Hambro, Faisal Azhar, Aurélien Rodriguez, Armand Joulin, Edouard Grave, and Guillaume Lample. Llama: Open and efficient foundation language models. *CoRR*, abs/2302.13971, 2023. doi: 10.48550/ARXIV.2302.13971. URL <https://doi.org/10.48550/arXiv.2302.13971>.
- Harsh Trivedi, Niranjan Balasubramanian, Tushar Khot, and Ashish Sabharwal. Interleaving retrieval with chain-of-thought reasoning for knowledge-intensive multi-step questions. *arXiv preprint arXiv:2212.10509*, 2022.
- Zhongwei Wan, Xin Wang, Che Liu, Samiul Alam, Yu Zheng, Jiachen Liu, Zhongnan Qu, Shen Yan, Yi Zhu, Quanlu Zhang, Mosharaf Chowdhury, and Mi Zhang. Efficient large language models: A survey. *CoRR*, abs/2312.03863, 2023. doi: 10.48550/ARXIV.2312.03863. URL <https://doi.org/10.48550/arXiv.2312.03863>.
- Fali Wang, Zhiwei Zhang, Xianren Zhang, Zongyu Wu, Tzuhao Mo, Qiuhaio Lu, Wanjing Wang, Rui Li, Junjie Xu, Xianfeng Tang, et al. A comprehensive survey of small language models in the era of large language models: Techniques, enhancements, applications, collaboration with llms, and trustworthiness. *ACM Transactions on Intelligent Systems and Technology*, 2024a.
- Lei Wang, Chen Ma, Xueyang Feng, Zeyu Zhang, Hao Yang, Jingsen Zhang, Zhiyuan Chen, Jiakai Tang, Xu Chen, Yankai Lin, et al. A survey on large language model based autonomous agents. *Frontiers of Computer Science*, 18(6):186345, 2024b.
- Peifeng Wang, Zhengyang Wang, Zheng Li, Yifan Gao, Bing Yin, and Xiang Ren. Scott: Self-consistent chain-of-thought distillation. *arXiv preprint arXiv:2305.01879*, 2023.
- Zeyu Wang. Causalbench: A comprehensive benchmark for evaluating causal reasoning capabilities of large language models. In *Proceedings of the 10th SIGHAN Workshop on Chinese Language Processing (SIGHAN-10)*, pp. 143–151, 2024.
- Jason Wei, Maarten Bosma, Vincent Y. Zhao, Kelvin Guu, Adams Wei Yu, Brian Lester, Nan Du, Andrew M. Dai, and Quoc V. Le. Finetuned language models are zero-shot learners. In *The Tenth International Conference on Learning Representations, ICLR 2022, Virtual Event, April 25-29, 2022*. OpenReview.net, 2022a. URL <https://openreview.net/forum?id=gEZrGCozdqR>.
- Jason Wei, Xuezhi Wang, Dale Schuurmans, Maarten Bosma, Fei Xia, Ed Chi, Quoc V Le, Denny Zhou, et al. Chain-of-thought prompting elicits reasoning in large language models. *Advances in neural information processing systems*, 35:24824–24837, 2022b.
- Guangzhi Xiong, Qiao Jin, Xiao Wang, Yin Fang, Haolin Liu, Yifan Yang, Fangyuan Chen, Zhixing Song, Dengyu Wang, Minjia Zhang, et al. Rag-gym: Optimizing reasoning and search agents with process supervision. *arXiv preprint arXiv:2502.13957*, 2025.
- Weihong Xu, Haein Choi, Po-kai Hsu, Shimeng Yu, and Tajana Simunic. Slim: A heterogeneous accelerator for edge inference of sparse large language model via adaptive thresholding. *ACM Transactions on Embedded Computing Systems*, 2025.
- Meng Yang, Yihao Wang, and Yu Gu. Language-based reasoning graph neural network for common-sense question answering. *Neural Networks*, 181:106816, 2025.

Zhilin Yang, Peng Qi, Saizheng Zhang, Yoshua Bengio, William Cohen, Ruslan Salakhutdinov, and Christopher D Manning. Hotpotqa: A dataset for diverse, explainable multi-hop question answering. In *Proceedings of the 2018 Conference on Empirical Methods in Natural Language Processing*, pp. 2369–2380, 2018.

Shunyu Yao, Jeffrey Zhao, Dian Yu, Nan Du, Izhak Shafran, Karthik Narasimhan, and Yuan Cao. React: Synergizing reasoning and acting in language models. In *International Conference on Learning Representations (ICLR)*, 2023.

Yue Zhang, Yafu Li, Leyang Cui, Deng Cai, Lemao Liu, Tingchen Fu, Xinting Huang, Enbo Zhao, Yu Zhang, Yulong Chen, et al. Siren’s song in the ai ocean: a survey on hallucination in large language models. *arXiv preprint arXiv:2309.01219*, 2023.

Zihan Zhang, Meng Fang, and Ling Chen. Retrievalqa: Assessing adaptive retrieval-augmented generation for short-form open-domain question answering. In Lun-Wei Ku, Andre Martins, and Vivek Srikumar (eds.), *Findings of the Association for Computational Linguistics, ACL 2024, Bangkok, Thailand and virtual meeting, August 11-16, 2024*, pp. 6963–6975. Association for Computational Linguistics, 2024. doi: 10.18653/V1/2024.FINDINGS-ACL.415. URL <https://doi.org/10.18653/v1/2024.findings-acl.415>.

Penghao Zhao, Hailin Zhang, Qinhan Yu, Zhengren Wang, Yunteng Geng, Fangcheng Fu, Ling Yang, Wentao Zhang, and Bin Cui. Retrieval-augmented generation for ai-generated content: A survey. *CoRR*, abs/2402.19473, 2024. doi: 10.48550/ARXIV.2402.19473. URL <https://doi.org/10.48550/arXiv.2402.19473>.

## A THE USE OF LARGE LANGUAGE MODELS (LLMS)

During the writing process of this paper, we utilized the large language models (LLMs) as an auxiliary tool, solely for polishing the grammar and expression of the paper to enhance its standardization and readability. The research conception, core content, experimental design, and conclusions of the paper were all independently completed by the authors, with the large language models not participating in any substantive aspects of the research or creative process.

## B ADDITIONAL EXPERIMENTAL RESULTS

As shown in Table 5, teacher architecture has a decisive impact on student adaptation under the TC+FM framework: across all scales (3B–72B), Qwen2.5-72B consistently surpasses Llama3.1-70B in both  $ACC_E$  and  $ACC_L$ . This pattern demonstrates that architectural alignment is the key of effective cognitive transfer in multi-hop reasoning.

## C TOOLS DESIGN

To enable efficient and accurate retrieval-driven reasoning, we adopt the ReAct framework as implemented in Qwen-Agent and develop two complementary tools. The first is a **Parallel Search Tool C.1** built on the Google Search API that performs parallel retrievals and makes retrieval decisions, enabling high-efficiency searching. The second is **FutureMind Tool C.2**, a module instantiated with a larger language model that strengthens structured reasoning and retrieval logic, enabling more precise, targeted retrieval. Together, these components decouple the complex retrieval process from the reasoning logic, enabling efficient and accurate retrieval execution, thereby facilitating better evidence integration and yielding more accurate final answers.



Table 5: Effect of Teacher Model Architecture on Student Performance. We evaluate student models (3B–72B) under different teacher model architectures, specifically Qwen2.5-72B-Instruct (denoted as Q2.5) and Llama3.1-70B-Instruct (denoted as L3.1) within the Toolcall-driven FutureMind (TC+FM). **Bold** denotes the best performance and underline indicates the second best. Rows with blue background correspond to the best teacher model architecture for each student model.

| Model    | Method       | 2WikiMQA         |                  | Bamboogle        |                  | Frames           |                  | MuSiQue          |                  | Avg              |                  |
|----------|--------------|------------------|------------------|------------------|------------------|------------------|------------------|------------------|------------------|------------------|------------------|
|          |              | ACC <sub>E</sub> | ACC <sub>L</sub> |
| Qwen-3B  | TC           | 54.20            | 42.40            | 37.60            | 40.00            | 17.96            | 22.94            | 13.00            | 12.60            | 30.69            | 29.49            |
|          | TC+FM (L3.1) | 47.80            | 34.00            | 27.20            | 27.20            | 11.53            | 9.83             | 10.20            | 10.40            | 24.18            | 20.36            |
|          | TC+FM (Q2.5) | 56.40            | 43.80            | 39.20            | 43.20            | 17.84            | 19.42            | 14.20            | 15.20            | <b>31.91</b>     | <b>30.41</b>     |
| Qwen-7B  | TC           | 56.80            | 56.20            | 49.60            | 54.40            | 23.78            | 32.28            | 16.40            | 18.80            | 36.65            | 40.42            |
|          | TC+FM (L3.1) | 53.60            | 50.20            | 48.80            | 51.20            | 19.54            | 26.58            | 14.20            | 17.20            | 34.03            | 36.30            |
|          | TC+FM (Q2.5) | 57.80            | 57.60            | 52.00            | 58.40            | 22.57            | 29.98            | 15.20            | 19.40            | <b>36.89</b>     | <b>41.34</b>     |
| Qwen-14B | TC           | 64.40            | 64.60            | 64.00            | 68.00            | 34.22            | 44.66            | 20.40            | 23.20            | 45.76            | 50.11            |
|          | TC+FM (L3.1) | 63.40            | 63.80            | 63.60            | 67.20            | 28.16            | 37.86            | 22.80            | 25.20            | 44.49            | 48.52            |
|          | TC+FM (Q2.5) | 70.00            | 71.60            | 64.00            | 68.00            | 35.92            | 48.06            | 25.80            | 28.20            | <b>48.93</b>     | <b>53.96</b>     |
| Qwen-32B | TC           | 71.20            | 72.40            | 66.40            | 68.80            | 36.28            | 49.15            | 24.60            | 27.80            | 49.62            | 54.54            |
|          | TC+FM (L3.1) | 63.40            | 61.40            | 66.40            | 68.00            | 28.79            | 38.74            | 23.20            | 26.20            | 45.45            | 48.59            |
|          | TC+FM (Q2.5) | 74.40            | 77.80            | 68.80            | 72.80            | 34.15            | 47.86            | 26.00            | 30.40            | <b>50.84</b>     | <b>57.21</b>     |
| Qwen-72B | TC           | 71.60            | 74.20            | 68.80            | 76.80            | 40.04            | 56.67            | 27.40            | 35.00            | 51.96            | 60.67            |
|          | TC+FM (L3.1) | 67.40            | 69.80            | 69.60            | 76.00            | 33.98            | 47.33            | 23.20            | 29.60            | 48.54            | 55.68            |
|          | TC+FM (Q2.5) | 74.20            | 80.60            | 75.20            | 79.20            | 41.38            | 58.59            | 27.40            | 34.60            | <b>54.55</b>     | <b>63.25</b>     |

Table 6: Additional results on four multi-hop QA benchmarks.

| Model    | Method      | 2WikiMQA         |                  | Bamboogle        |                  | Frames           |                  | MuSiQue          |                  | AVG              |                  |
|----------|-------------|------------------|------------------|------------------|------------------|------------------|------------------|------------------|------------------|------------------|------------------|
|          |             | ACC <sub>E</sub> | ACC <sub>L</sub> |
| Qwen-14B | TC          | 64.40            | 64.60            | 64.00            | 68.00            | 34.22            | 44.66            | 20.40            | 23.20            | 45.76            | 50.12            |
|          | TC+FM (3B)  | 68.40            | 70.00            | 58.40            | 64.00            | 32.89            | 43.33            | 22.80            | 27.00            | 45.62            | 51.08            |
|          | TC+FM (7B)  | 69.00            | 71.20            | 63.20            | 72.00            | 33.37            | 46.84            | 20.60            | 24.40            | 46.54            | 53.61            |
|          | TC+FM (14B) | 71.60            | 75.20            | 70.40            | 72.80            | 34.83            | 49.51            | 24.00            | 28.20            | 50.21            | 56.43            |
|          | TC+FM (32B) | 71.80            | 74.40            | 64.80            | 72.00            | 35.25            | 46.24            | 22.20            | 27.20            | 48.51            | 54.96            |
|          | TC+FM (72B) | 70.00            | 71.60            | 64.00            | 68.00            | 35.92            | 48.06            | 25.80            | 28.20            | 48.93            | 53.96            |
| Qwen-32B | TC          | 71.20            | 72.40            | 66.40            | 68.80            | 36.28            | 49.15            | 24.60            | 27.80            | 49.62            | 54.54            |
|          | TC+FM (3B)  | 70.40            | 70.00            | 60.80            | 67.20            | 32.77            | 44.53            | 22.60            | 24.80            | 46.64            | 51.63            |
|          | TC+FM (7B)  | 71.80            | 73.20            | 61.60            | 67.80            | 34.83            | 45.14            | 22.90            | 25.80            | 47.28            | 53.49            |
|          | TC+FM (14B) | 74.60            | 76.40            | 70.40            | 75.20            | 35.19            | 47.33            | 23.20            | 29.80            | 50.85            | 57.18            |
|          | TC+FM (32B) | 69.60            | 70.00            | 64.00            | 73.60            | 31.10            | 42.89            | 21.00            | 24.60            | 46.43            | 52.77            |
|          | TC+FM (72B) | 74.40            | 77.80            | 68.80            | 72.80            | 37.15            | 53.86            | 26.00            | 30.40            | 51.59            | 59.71            |
| Qwen-72B | TC          | 71.60            | 74.20            | 68.80            | 76.80            | 40.04            | 56.67            | 27.40            | 35.00            | 51.96            | 60.67            |
|          | TC+FM (3B)  | 71.20            | 75.20            | 65.60            | 72.00            | 38.23            | 53.64            | 24.60            | 29.40            | 49.91            | 57.56            |
|          | TC+FM (7B)  | 72.80            | 76.80            | 71.20            | 76.00            | 37.13            | 55.70            | 24.60            | 30.40            | 51.93            | 59.73            |
|          | TC+FM (14B) | 71.00            | 73.40            | 74.40            | 77.60            | 35.56            | 50.12            | 23.60            | 30.00            | 51.14            | 57.78            |
|          | TC+FM (72B) | 74.20            | 80.60            | 75.20            | 79.20            | 41.38            | 58.59            | 28.40            | 36.60            | 54.80            | 63.75            |

### C.1 PARALLEL SEARCH TOOL

#### Parallel Search Tool (Google) Introduction

**Name:** Parallel\_Search (google)

**Description:**

You should invoke the Parallel\_Search Tool (google) whenever the user’s query falls into one of the following categories:

1. Your internal knowledge base and training data are insufficient to answer the question accurately.
2. The user asks about a specific example, product, or piece of information that you can

retrieve in greater detail via the web.

3. The question involves the latest data, dynamic information, or any knowledge that postdates your training cutoff and requires real-time updates.
4. The answer exists in external knowledge sources you cannot directly access; you must search to retrieve it.
5. Although you possess general knowledge of the topic, an online search would yield more detailed or up-to-date information (e.g. current buzzwords or trending topics).
6. You encounter an unfamiliar term or concept and must avoid fabrication by verifying it through the search tool.
7. You need to consult a product manual or official specification to support your response.

The search tool supports both parallel and sequential queries:

1. If multiple searches are independent, you may issue them in parallel.
2. If queries depend on each other (i.e. require ordered steps), perform them sequentially.

#### Parameters:

```
{
  "type": "object",
  "properties": {
    "queries": {
      "type": "array",
      "items": { "type": "string" },
      "description": (
        "List of search keywords:"
        "- Parallel search: supply multiple keywords at once;"
        "- Iterative search: supply a single-element array."
      ),
      "examples": [
        {
          "queries": [
            "Xiaomi SU7 Ultra official price",
            "Tesla Model S latest price"
          ]
        },
        {
          "queries": ["Mishi wolffin fish namer"]
        }
      ]
    },
    "required": ["queries"]
  }
}
```

## C.2 FUTUREMIND TOOL

### FutureMind Tool Introduction

**Name:** FutureMind

#### Description:

Upon receiving a query, the FutureMind Tool is invoked first to obtain a **systematic thinking pattern and solution roadmap** for the problem.

For retrieval-oriented questions:

1. It produces a structured problem-solving workflow and retrieval strategy.
2. It explicitly delineates the logical chain from "Problem Definition" through "Condition

Decomposition" to "Conclusion Derivation."

3. It provides executable search sequences and combined query conditions as retrieval guidance, thereby enhancing information acquisition efficiency and ensuring retrieval accuracy.

**Parameters:**

```
{
  "type": "object",
  "properties": {
    "query": {
      "type": "string",
      "description": "A query that requires systematic
        problem analysis and retrieval-strategy formulation"
    }
  },
  "required": ["query"]
}
```

## D TOOLCALL TEMPLATE

### Toolcall Template

**Tools**

You may call one or more functions to assist with the user query.

You are provided with function signatures within `<tools></tools>` XML tags:

```
<tools>
{tool_descs}
</tools>
```

For each function call, return a json object with function name and arguments within `<tool_call></tool_call>` XML tags:

```
<tool_call>
{"name": <function-name>, "arguments": <args-json-object>}
</tool_call>
```

## E FUTUREMIND: DESCRIPTION AND IMPLEMENTATION DETAILS

### E.1 OVERVIEW OF FUTUREMIND

As depicted in Figure 2, FutureMind is a lightweight, zero-training-cost reasoning framework that transfers systematic thinking patterns from teacher models to smaller student models via **adaptive thinking-pattern distillation**. It decomposes tasks into four staged modules—Problem Analysis, Logical Reasoning, Strategy Planning, and Retrieval Guidance—and emits concise, auditable plans that specify whether to retrieve, what to retrieve, and how to integrate evidence. To reduce retrieval overhead, the framework supports three composable paradigms (Figure 3): Forward Stepwise Reasoning, Backward Constraint Focusing, and Parallel Intersection Reasoning. Overall, FutureMind enables resource-constrained models to perform structured, low-latency retrieval and reasoning with improved accuracy and interpretability.

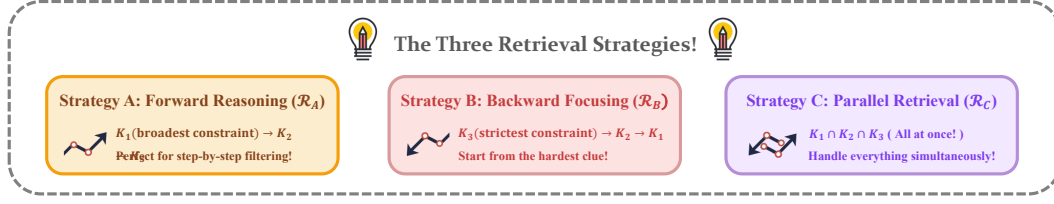

Figure 3: Three adaptive retrieval paradigms employed in FutureMind.

## E.2 INSTRUCTION FOR ENHANCED TOOLCALL USING PARALLEL SEARCH TOOL C.1

### Instruction for Enhanced ToolCall Using Parallel Search Tool

**System:**

You are a helpful assistant.

**Tools:**

You may call one or more functions to assist with the user query. You are provided with function signatures within `<tools></tools>` XML tags:

```
<tools>
  {
    "type": "function",
    "function":
      {
        "name": "google_search",
        "description": "Parallel Search Tool of
          description",
        "parameters": "Parallel Search Tool of
          parameters",
      }
  }
</tools>
```

For each function call, return a json object with function name and arguments within `<tools></tools>` XML tags:

```
<tool_call>
{"name": <function-name>, "arguments": <args-json-object>}
</tool_call>
```

**User:**

**Question: {user question}**

You FIRST think about the reasoning process as an internal monologue and then provide the final answer. The reasoning process MUST BE enclosed within `<think> </think>` tags. The final answer MUST BE put in `<answer> </answer>` tags.

## E.3 INSTRUCTION FOR TOOLCALL-DRIVEN FUTUREMIND USING PARALLEL SEARCH TOOL C.1

### Instruction for ToolCall-driven FutureMind Using Parallel Search Tool

**System:**

You are a helpful assistant.

**Tools:**

You may call one or more functions to assist with the user query.

You are provided with function signatures within `<tools></tools>` XML tags:

```
<tools>
  {
    "type": "function",
    "function":
      {
        "name": "Parallel Search",
        "description": "Parallel Search Tool of
          description",
        "parameters": "Parallel Search Tool of
          parameters",
      }
  }
</tools>

<tools>
  {
    "type": "function",
    "function":
      {
        "name": "futuremind",
        "description": "Futuremind Tool of
          description",
        "parameters": "Futuremind Tool of parameters",
      }
  }
</tools>
```

For each function call, return a json object with function name and arguments within `<tools></tools>` XML tags:

```
<tool_call>
  {
    "name": <function-name>,
    "arguments": <args-json-object>
  }
</tool_call>
```

**user:**

**Question: {user question}**

You FIRST think about the reasoning process as an internal monologue and then provide the final answer. The reasoning process MUST BE enclosed within `<think> </think>` tags. The final answer MUST BE put in `<answer> </answer>` tags. First, invoke the "futuremind" tool to obtain a systematic thinking strategy and solution roadmap for the given Question (original question text verbatim). After that, you may call the search tool multiple times as needed to gather or verify information until you have sufficient material to answer. Once all necessary information is confirmed, provide the final answer using concise, focused language without unnecessary elaboration.

#### E.4 RELATED METHODS: ENHANCED TOOLCALL (TC) AND TOOLCALL-DRIVEN FUTUREMIND (TC+FM)

**Enhanced ToolCall (TC).** Enhanced ToolCall (TC) is implemented on top of the ReAct framework, following the Toolcall Template D. To support efficient information access, we employ the **Parallel Search Tool C.1**, which enables parallel retrieval while constraining the reasoning process to a maximum of 10 steps. This design ensures both efficiency and controllability. The reasoning process follows the predefined instructions provided in E.2.



**ToolCall-driven FutureMind (TC+FM).** ToolCall-driven FutureMind (TC+FM) extends this design by incorporating **FutureMind (FM) Method** into the enhanced ToolCall framework. For more efficient and robust aggregation of retrieved evidence, we employ the **Parallel Search Tool C.1** and **FutureMindTool C.2**, which enables parallel retrieval while constraining the reasoning process to a maximum of 10 steps. This design further improve retrieval robustness while maintaining controllable reasoning. The reasoning process follows the predefined instructions provided in E.3.

#### E.5 MODULE OF FUTUREMIND: PROBLEM ANALYSIS-LOGICAL REASONING-STRATEGY PLANNING-RETRIEVAL GUIDANCE

##### E.5.1 PROBLEM ANALYSIS MODULE

###### Problem Analysis Module Instructions

**Name of Module:** Problem Analysis

**Instruction:** Please first identify the core conflict, intrinsic attributes, and target outcomes of the problem; extract key dimensions C1, C2, C3, C4 (e.g., causal relationships, constraints, objective functions).

##### E.5.2 LOGICAL REASONING MODULE

###### Logical Reasoning Module Instructions

**Name of Module:** Logical Reasoning

**Instruction:** Apply first principles to reverse-engineer the underlying logic, determine critical conditional elements (denoted K1, K2, K3, K4), and order them by importance or logical sequence.

##### E.5.3 STRATEGY PLANNING MODULE

###### Strategy Planning Module Instructions

**Name of Module:** Strategy Planning

**Instruction:** Thinking Strategies (Select one or more as appropriate).

###### Strategy A: Forward Stepwise Reasoning (Progressive Filtering)

- Sequentially filter from basic to decisive conditions:
  - a. Retrieve the set A meeting base condition K1;
  - b. From A, filter the subset B meeting secondary condition K2;
  - c. From B, filter the subset C meeting key condition K3;
  - d. Within C, verify candidates satisfying decisive condition K4.

###### Strategy B: Backward Constraint Focusing (Reverse Narrowing)

- Reverse-derive from stringent constraints to base compatibility:
  - a. Prioritize retrieving set A satisfying the strictest constraint (e.g., K3) to narrow scope quickly;
  - b. From A, filter set B meeting critical feature condition (e.g., K4);
  - c. From B, verify set C satisfying prerequisite condition (e.g., K2);
  - d. Within C, confirm final candidates compatible with baseline condition (e.g., K1).

###### Strategy C: Parallel Intersection Reasoning (Parallel Filtering)

- Treat conditions as independent dimensions in parallel:
  - a. Retrieve sets A, B, C, D each satisfying conditions K1, K2, K3, K4 respectively;
  - b. Compute intersection ( $A \cap B \cap C \cap D$ ) to extract solutions meeting all conditions

simultaneously.

**Choose the strategy (or combination) based on problem characteristics, data availability, and efficiency requirements.**

#### E.5.4 RETRIEVAL GUIDANCE MODULE

##### Retrieval Guidance Module Instructions

**Name of Module:** Retrieval Guidance

**Instruction:** Thinking Strategies (Select one or more as appropriate).

##### Keyword Guidance

Derive core entities, attributes, and relationships from the problem analysis (e.g., "AI + ethical risks + regulatory policy").

##### Resource Guidance

List authoritative sources relevant to the domain: academic databases, industry reports, government or standards bodies, etc. (e.g., PubMed, IEEE Xplore, World Bank Data).

##### Sequence Guidance

Design the retrieval sequence by priority or logic (e.g., first industry standards, then empirical studies, finally policy documents).

##### Query Guidance

Formulate layered/combined search expressions supporting iterative filtering: e.g., ("AI ethical risks" AND "regulatory policy") OR ("autonomous driving safety standards" AND "EU regulations"), or retrieve with keyword A first, then refine results with keyword B.

##### Screening Guidance

Define preliminary inclusion/exclusion criteria and relevance assessment to support deeper analysis later.

## F INSTRUCTION TEMPLATES

### F.1 INSTRUCTIONS FOR EVALUATION

In this work, we use LLM-as-Judges (GPT-4o-mini) to evaluate multi-hop question answering (QA) benchmarks: 2WikiMultihopQA, Bamboogle, MuSiQue, and FRAMES. The specific instructions are as follows.

#### Instruction for Judge

Given a Question and its Golden Answer, verify whether the Predicted Answer is correct. The prediction is correct if it fully aligns with the meaning and key information of the Golden Answer. Respond with True if the prediction is correct and False otherwise.

[Question:] {user question}

[Golden Answer] {reference answer}

[Predicted Answer] {assistant's answer}

## F.2 INSTRUCTION FOR NAIVE GENERATION

### Instruction for Naive Generation

Please answer the below questions. You should think step by step to solve it. The final answer MUST BE put in <answer> </answer> tags.

[Question:] {user question}

## F.3 INSTRUCTION FOR STANDARD RAG

### Instruction for Standard RAG

You are a knowledgeable assistant that utilizes the provided documents to answer the user’s question accurately.

Guidelines:

- Analyze the provided documents to extract relevant information. Synthesize the information to formulate a coherent and accurate answer.
- Ensure that your response directly addresses the user’s question using the information from the documents.

[Question:] {user question}

[Documents:] {documents}

## F.4 INSTRUCTION FOR SEARCH-O1

### Instruction for Search-o1

You are a reasoning assistant with the ability to perform web searches to help you answer the user’s question accurately. You have special tools:

To perform a search: write <begin\_search\_query> your query here <end\_search\_query>. Then, the system will search and analyze relevant web pages, then provide you with helpful information in the format <begin\_search\_result> ...search results... <end\_search\_result>. You can repeat the search process multiple times if necessary. The maximum number of search attempts is limited to {MAX\_SEARCH\_LIMIT}.

Once you have all the information you need, continue your reasoning.

Example:

Question: “...”

Assistant thinking steps:

- I might need to look up details about ...

Assistant:

<begin\_search\_query>...<end\_search\_query>

(System returns processed information from relevant web pages)

Assistant continues reasoning with the new information...

Remember:

- Use <begin\_search\_query> to request a web search and end with <end\_search\_query>.
- When done searching, continue your reasoning.

## G CASE STUDY

We present a case study to illustrate the full pipeline of the proposed FutureMind method [2](#). The case is drawn from the MuSiQue benchmark, which poses a question that the Qwen2.5-7B-Instruct model alone can hardly answer correctly. We then demonstrate how the proposed ToolCall-driven FutureMind employs Qwen2.5-14B-Instruct as a teacher model to guide Qwen2.5-7B-Instruct in solving the problem, and provide the full reasoning trajectory leading to the final answer.

## Case Trajectory in MuSiQue

**Question:** When was the Palau de la Generalitat built in the city in which died the man called Martin of the region of Spain where Berdejo is located?

## Step 1

<think>

I'm not fully familiar with this question, so I'll first call the FutureMind tool to get a systematic thinking pattern and roadmap.

</think>

<tool\_call>

```
{ "name": "FutureMind", "arguments": { "query": ["When was the Palau de la Generalitat built in the city in which died the man called Martin of the region of Spain where Berdejo is located?"] } }
```

</tool\_call>

<tool\_response>

1. **Problem Analysis** - Identify the construction date of the Palau de la Generalitat in the city where Martin of the region of Spain, where Berdejo is located, died.

2. **Logical Reasoning** - Key conditional elements

K1 (correct identification of Martin and his region in Spain)

K2 (connection between Martin and the city of death)

K3 (location of Berdejo in Spain)

K4 (construction date of the Palau de la Generalitat in the identified city)

3. **Strategy Planning** - Selected strategy A (Forward Stepwise Reasoning)

a. Retrieve information on Martin of the region in Spain where Berdejo is located (K1)

b. From the information, identify the city where Martin died (K2)

c. Verify the connection between Berdejo and the identified region in Spain (K3)

d. Within the identified city, find the construction date of the Palau de la Generalitat (K4)

4. **Retrieval Guidance**

**Keywords:** Martin of [region in Spain], Berdejo, Palau de la Generalitat, construction date

**Resources:** Wikipedia, Encyclopedia Britannica, Spanish historical archives, local government websites of the identified region and city

**Sequence:** Historical biographies → regional information → local historical records → architectural or government websites

**Query:** “Martin of [region in Spain] biography”; “Berdejo location in Spain”; “Palau de la Generalitat construction date” in the identified city

**Screening:** Exclude non-relevant biographies or historical records; limit to sources with verifiable information on the construction date.

</tool\_response>

## Step 2

<think>

To answer the question, the goal is to identify the construction date of the Palau de la Generalitat in the city where Martin, from the region in Spain where Berdejo is located, died. The key steps are: 1. First, gather information about Martin and the region where Berdejo is located. This will allow the identification of the city where Martin died. 2. Then, validate the connection between Berdejo's location and the identified region in Spain. 3. After identifying the city where Martin died, find the construction date of the Palau de la Generalitat in that city. The selected strategy is Forward Stepwise Reasoning, and the reasoning involves retrieving historical and regional data followed by architectural information for the Palau de la Generalitat. The next step is to search for relevant data using the following queries.

</think>

<tool\_call>

{"name": "google\_search", "arguments": {"query": ["Martin of [region in Spain] biography", "Berdejo location in Spain", "Palau de la Generalitat construction date"]}}

</tool\_call>

<tool\_response>

Martin (born 1356, Gerona, Catalonia [Spain]—died May 31, 1410, Barcelona) was the king of Aragon from 1395 and of Sicily (as Martin II from 1409) (<https://www.britannica.com/biography/Martin-king-of-Aragon-and-Sicily>)

From March 2 to 14, 2024, the Palau de la Generalitat de Valencia opens its doors and invites you to explore this historic building that houses the Presidency (<https://www.visitvalencia.com/en/events-valencia/palau-de-la-generalitat-opens-its-doors-celebrate-fallas>)

...

</tool\_response>

### Step 3

<think>

The search results reveal the following: 1. Several individuals named Martin exist in different regions of Spain, but Martin I of Aragon (1392–1409) seems the most relevant. However, further information about his death location is needed. 2. Berdejo is a town in the Zaragoza province of Aragon, Spain. 3. The Palau de la Generalitat in Barcelona dates back to the 15th century. Given the lack of a direct link between Martin I and Berdejo, we will refine the search to focus on identifying the city where Martin I died, and its potential connection to Berdejo. The next search query will be: Martin I of Aragon death place.

</think>

<tool\_call>

{"name": "google\_search", "arguments": {"query": ["Martin I of Aragon death place"]}}

</tool\_call>

<tool\_response>

Matino is the son of King Martin I of Aragon. In the 1390, Matino married the Sicilian Queen and cousin Maria and became co-king. After Matino's death in 1409, his father became King of Sicily, known as Matino (<https://www.wikiwand.com/zh-cn/articles>)

...

</tool\_response>

### Step 4

<think>

Martin I of Aragon died in Barcelona on May 31, 1410. The question asks for the construction date of the Palau de la Generalitat in Barcelona, where Martin died, and relates it to Berdejo, located in Zaragoza, Aragon. Since Berdejo is in a different region (Aragon) and the Palau de la Generalitat is in Barcelona (Catalonia), we need to focus on the construction of the Palau de la Generalitat in Barcelona. This was completed in the 15th century, and since Martin I died in 1410, the building was already constructed by then.

</think>

<answer>The Palau de la Generalitat in Barcelona, Spain, was built in the 15th century, long before Martin I of Aragon died in 1410. <answer> ✓
