# Supplementary material
Source: ML conference proceedings conference paper supplement (https://openreview.net/forum?id=gX42SSbjcC)
Supplement: supplementary_material [file FutureMind_framework.pdf › ICLR_2142/figures/FutureMind_framework.pdf]

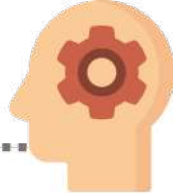

# FUTUREMIND

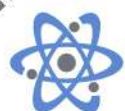

Problem Analysis → Logical Reasoning → Strategy Planning → Retrieval Guidance

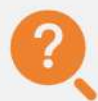

## Problem Analysis

Let's break down the problem to identify its core conflict and key conditions.

1. Core **O**bjectives

2. Intrinsic **A**tttributes

3. **T**arget Outcomes

4. Critical **C**onditions

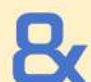

## Logical Reasoning

Use first principles to deduce step-by-step and clarify the logical sequence and priorities.

$K_1$  : [critical condition]     $K_2$  : [critical condition]     $K_3$  : [critical condition]    ...     $K_m$  : [critical condition]

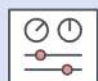

## Strategy Planning

Develop an efficient retrieval strategy based on problem characteristics and available resources.

$\mathcal{R}_A$ : Forward Stepwise Reasoning

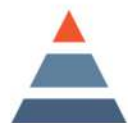

$K_1$ (broadest constraint)  
→  $K_2$  →  $K_3$  → Final set

$\mathcal{R}_B$ : Backward Constraint Focusing

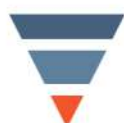

$K_3$ (strictest constraint)  
→  $K_2$  →  $K_1$  → Final set

$\mathcal{R}_C$ : Parallel Intersection Reasoning

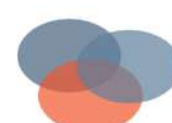

$(K_1 \cap K_2 \cap K_3)$   
→ Final set

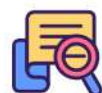

## Retrieval Guidance

Translate the strategy into actionable steps, defining keywords, screening criteria, and execution plans.

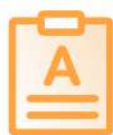

Keyword

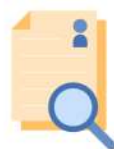

Resource

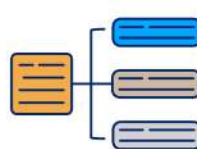

Sequence

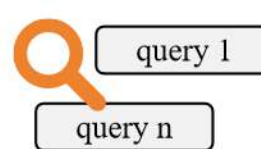

Query

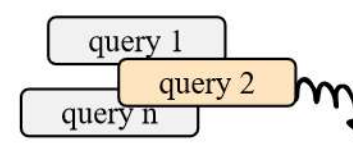

Screening
