# Supplementary material
Source: ML conference proceedings conference paper supplement (https://openreview.net/forum?id=gX42SSbjcC)
Supplement: supplementary_material [file heatmap_delta.pdf › ICLR_2142/figures/heatmap_delta.pdf]

$\Delta$  Performance vs All Strategies (per benchmark & metric)

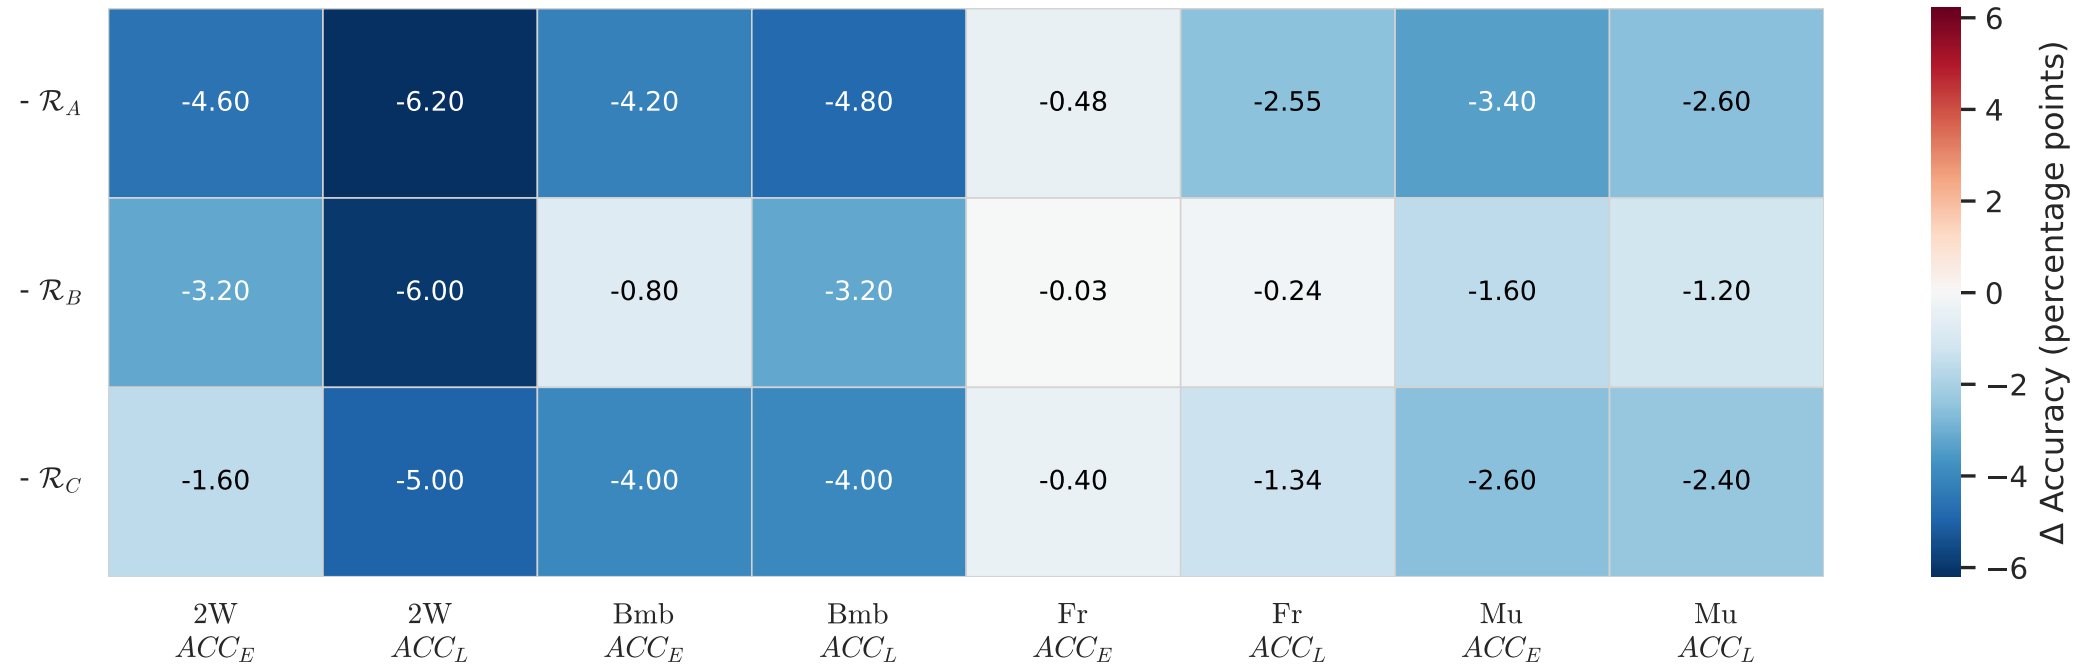

Short names: 2W=2WikiMQA, Bmb=Bamboogle, Fr=Frames, Mu=Musique
