# Supplementary material
Source: ML conference proceedings conference paper supplement (https://openreview.net/forum?id=gX42SSbjcC)
Supplement: supplementary_material [file three_adaptive_retrieval_paradigms.pdf › ICLR_2142/figures/three_adaptive_retrieval_paradigms.pdf]

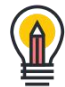

## The Three Retrieval Strategies!

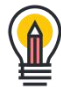

### Strategy A: Forward Reasoning ( $\mathcal{R}_A$ )

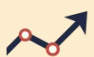

$K_1$  (broadest constraint)  $\rightarrow K_2$

Perfect for step-by-step filtering!

### Strategy B: Backward Focusing ( $\mathcal{R}_B$ )

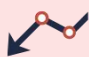

$K_3$  (strictest constraint)  $\rightarrow K_2 \rightarrow K_1$

Start from the hardest clue!

### Strategy C: Parallel Retrieval ( $\mathcal{R}_C$ )

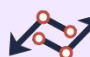

$K_1 \cap K_2 \cap K_3$  (All at once!)

Handle everything simultaneously!
