# Supplementary material
Source: ML conference proceedings conference paper supplement (https://openreview.net/forum?id=gX42SSbjcC)

Average Performance Drop Per Strategy Removal

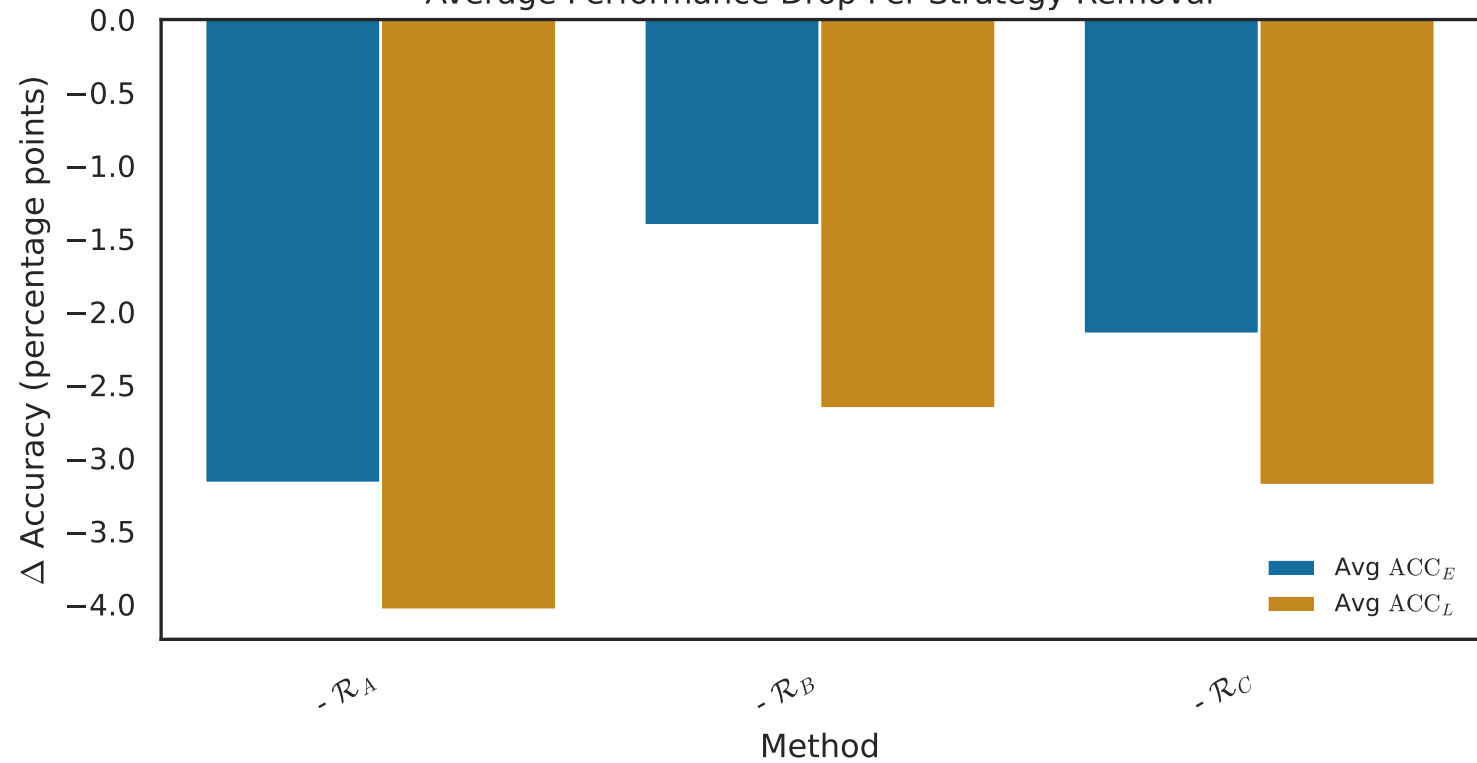

Supplement: supplementary_material [file bar_avg_delta.pdf › ICLR_2142/figures/bar_avg_delta.pdf]

### Qwen-3B-Instruct Performance

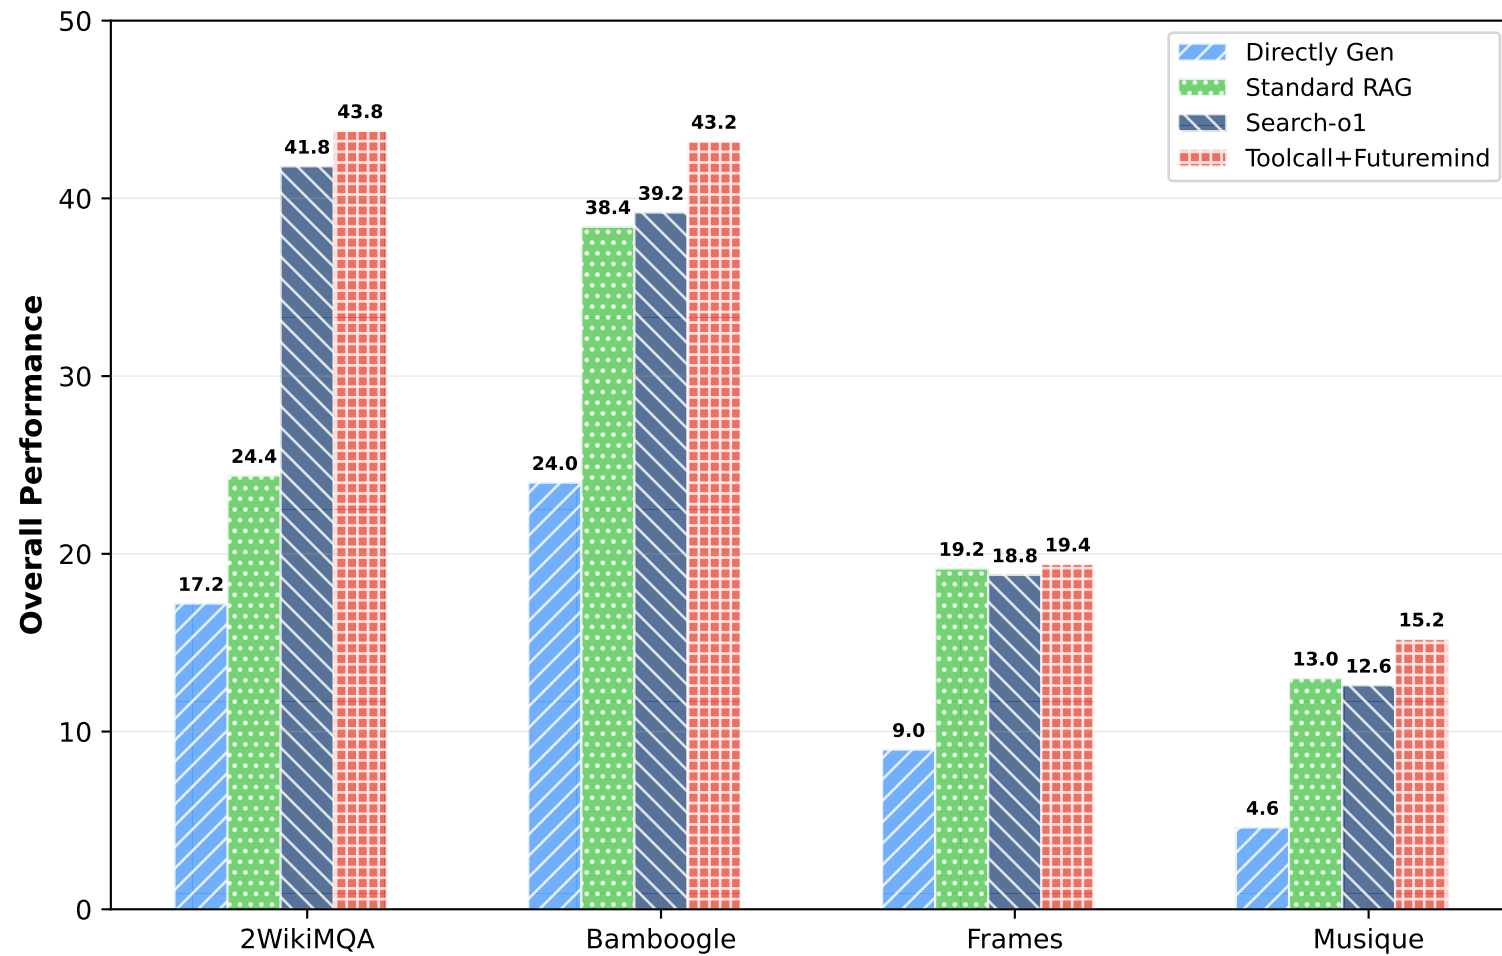

### Qwen-72B-Instruct Performance

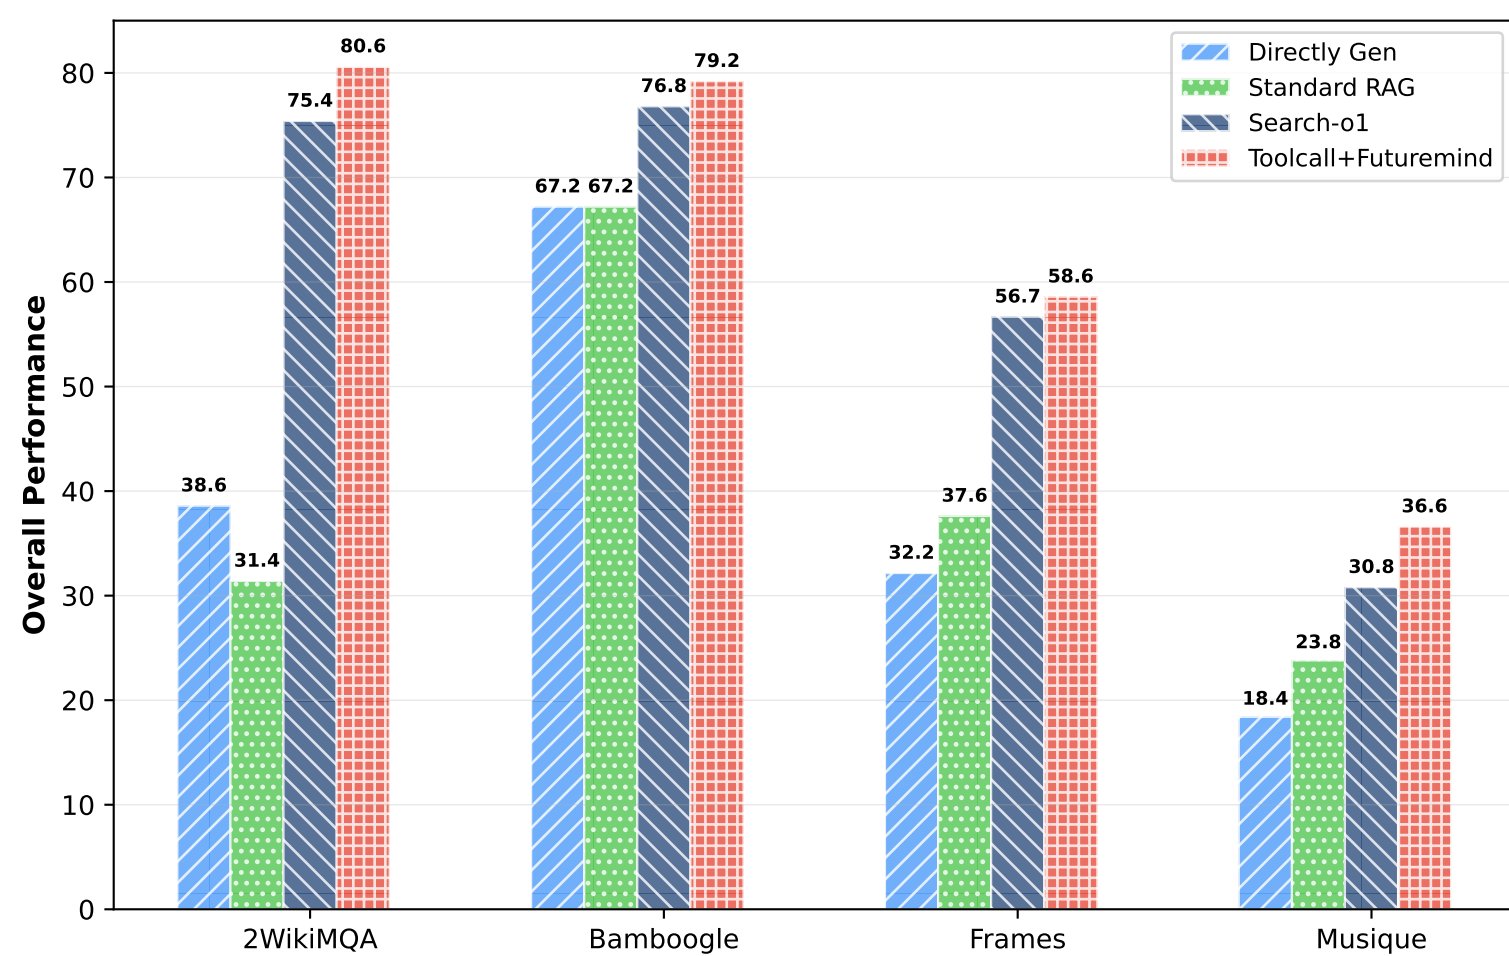

Supplement: supplementary_material [file model_performance_comparison.pdf › ICLR_2142/figures/model_performance_comparison.pdf]
